# Calcium current modulation by the $\gamma_1$ subunit depends on alternative splicing of Cav1.1

**Running title:**  $\gamma_1$  modulation of Cav1.1 currents

**Yousra El Ghaleb<sup>1</sup>, Nadine J. Ortner<sup>2</sup>, Wilfried Posch<sup>3</sup>, Monica L. Fernández-Quintero<sup>4</sup>, Wietske E. Tuinte<sup>1</sup>, Stefania Monteleone<sup>4,5</sup>, Henning J. Draheim<sup>6</sup>, Klaus R. Liedl<sup>4</sup>, Doris Wilflingseder<sup>3</sup>, Jörg Striessnig<sup>2</sup>, Petronel Tuluc<sup>2</sup>, Bernhard E. Flucher<sup>1</sup>, Marta Campiglio<sup>1</sup>**

<sup>1</sup>Department of Physiology and Medical Biophysics, Medical University Innsbruck, 6020 Innsbruck, Austria

<sup>2</sup>Department of Pharmacology and Toxicology, Center for Molecular Biosciences Innsbruck, University of Innsbruck, 6020 Innsbruck, Austria

<sup>3</sup>Institut of Hygiene and Medical Microbiology, Medical University of Innsbruck, 6020 Innsbruck, Austria

<sup>4</sup>Institute of General, Inorganic and Theoretical Chemistry, University of Innsbruck, Innsbruck, Austria

<sup>5</sup>current affiliation: Evotec (UK) Ltd., Abingdon, UK

<sup>6</sup>Boehringer Ingelheim Pharma GmbH & Co KG, CNS Research, 88400 Biberach an der Riss, Germany

## ORCID IDs:

|                             |                                                                                           |
|-----------------------------|-------------------------------------------------------------------------------------------|
| Yousra El Ghaleb            | <a href="https://orcid.org/0000-0002-0829-5865">https://orcid.org/0000-0002-0829-5865</a> |
| Nadine J. Ortner            | <a href="https://orcid.org/0000-0003-3882-3283">https://orcid.org/0000-0003-3882-3283</a> |
| Wilfried Posch              | <a href="https://orcid.org/0000-0001-8955-7654">https://orcid.org/0000-0001-8955-7654</a> |
| Monica L Fernandez-Quintero | <a href="https://orcid.org/0000-0002-6811-6283">https://orcid.org/0000-0002-6811-6283</a> |
| Wietske Tuinte              | <a href="https://orcid.org/0000-0003-0331-0402">https://orcid.org/0000-0003-0331-0402</a> |
| Stefania Monteleone         | <a href="https://orcid.org/0000-0003-0948-5414">https://orcid.org/0000-0003-0948-5414</a> |
| Klaus R Liedl               | <a href="https://orcid.org/0000-0002-0985-2299">https://orcid.org/0000-0002-0985-2299</a> |
| Doris Wilflingsleder        | <a href="https://orcid.org/0000-0002-5888-5118">https://orcid.org/0000-0002-5888-5118</a> |
| Jörg Striessnig             | <a href="https://orcid.org/0000-0002-9406-7120">https://orcid.org/0000-0002-9406-7120</a> |
| Petronel Tuluc              | <a href="https://orcid.org/0000-0003-3660-6138">https://orcid.org/0000-0003-3660-6138</a> |
| Bernhard Flucher            | <a href="https://orcid.org/0000-0002-5255-4705">https://orcid.org/0000-0002-5255-4705</a> |
| Marta Campiglio             | <a href="https://orcid.org/0000-0002-9629-2073">https://orcid.org/0000-0002-9629-2073</a> |

Correspondence to: [marta.campiglio@i-med.ac.at](mailto:marta.campiglio@i-med.ac.at), [bernhard.e.flucher@i-med.ac.at](mailto:bernhard.e.flucher@i-med.ac.at)

## Summary

El Ghaleb et al. analyzed the effects of the  $\gamma_1$  subunit on current properties and expression of the adult (Ca<sub>v</sub>1.1a) and embryonic (Ca<sub>v</sub>1.1e) calcium channel splice variants, demonstrating that  $\gamma_1$  reduces the current amplitude in a splicing-dependent manner.

## Abstract

The skeletal muscle voltage-gated calcium channel (Ca<sub>v</sub>1.1) primarily functions as voltage sensor for excitation-contraction coupling. Conversely, its ion-conducting function is modulated by multiple mechanisms within the pore-forming  $\alpha_{1S}$  subunit and the auxiliary  $\alpha_2\delta$ -1 and  $\gamma_1$  subunits. Particularly, developmentally regulated alternative splicing of exon 29, which inserts 19 amino acids in the extracellular IVS3-S4 loop of Ca<sub>v</sub>1.1a, greatly reduces the current density and shifts the voltage-dependence of activation to positive potentials outside the physiological range. We generated a new HEK293-cell line stably expressing  $\alpha_2\delta$ -1,  $\beta_3$ , and STAC3. When the adult (Ca<sub>v</sub>1.1a) and the embryonic (Ca<sub>v</sub>1.1e) splice variants were expressed in these cells, the difference in the voltage-dependence of activation observed in muscle cells was reproduced, but not the reduced current density of Ca<sub>v</sub>1.1a. Only when we further co-expressed the  $\gamma_1$  subunit, the current density of Ca<sub>v</sub>1.1a, but not of Ca<sub>v</sub>1.1e, was reduced by >50 %. In addition,  $\gamma_1$  caused a shift of the voltage-dependence of inactivation to negative voltages in both variants. Thus, the current-reducing effect of  $\gamma_1$ , but not its effect on inactivation, is specifically dependent on the inclusion of exon 29 in Ca<sub>v</sub>1.1a. Molecular structure modeling revealed several direct ionic interactions between oppositely charged residues in the IVS3-S4 loop and the  $\gamma_1$  subunit. However, substitution of these residues by alanine, individually or in combination, did not abolish the  $\gamma_1$ -dependent reduction of current density, suggesting that structural rearrangements of Ca<sub>v</sub>1.1a induced by inclusion of exon 29 allosterically empower the  $\gamma_1$  subunit to exert its inhibitory action on Ca<sub>v</sub>1.1 calcium currents.

## Introduction

Excitation-contraction (EC) coupling in skeletal muscle is initiated by action potentials that activate the voltage-gated calcium channel  $Ca_v1.1$  located in the transverse (T-) tubules. In adult skeletal muscle  $Ca_v1.1$  functions as voltage-sensor, which triggers the opening of the calcium release channel, the ryanodine receptor (RyR1), in the sarcoplasmic reticulum (SR) via protein-protein interactions, thus initiating muscle contraction (Rios and Brum 1987; Schneider and Chandler 1973). Because of the conformational coupling between  $Ca_v1.1$  and RyR1,  $Ca_v1.1$  currents are dispensable for skeletal muscle EC coupling (Armstrong, Bezanilla, and Horowicz 1972; Dayal et al. 2017). Accordingly, in mammals  $Ca_v1.1$  channels activate only upon strong, non-physiological membrane depolarization and conduct small and slowly activating currents (Tanabe et al. 1988). This is strikingly different in the embryonic splice variant ( $Ca_v1.1e$ ), which lacks 19 amino acids in the extracellular loop connecting segments S3 and S4 in the IV homologous repeat, due to alternative splicing excluding exon 29 (Tuluc et al. 2009). The embryonic  $Ca_v1.1e$  isoform activates upon physiological membrane depolarization and conducts currents that are substantially larger in amplitude than those of the adult  $Ca_v1.1a$  isoform.

$Ca_v1.1$  is a multi-protein complex consisting of a pore-forming  $\alpha_1$  subunit and several auxiliary proteins: the intracellular  $\beta_{1a}$ , the glycosylphosphatidylinositol (GPI) anchored extracellular  $\alpha_2\delta-1$ , and the transmembrane  $\gamma_1$  subunits (Curtis and Catterall 1984; Zamponi et al. 2015). While the  $\beta_{1a}$  subunit was shown to be essential for the functional expression of  $Ca_v1.1$  and for EC coupling (Gregg et al. 1996; Schredelseker et al. 2005),  $\alpha_2\delta-1$  and  $\gamma_1$  are dispensable for functional expression of  $Ca_v1.1$ , but displayed an inhibitory effect on  $Ca_v1.1$  currents (Freise et al. 2000; Obermair et al. 2005; Held et al. 2002; Ursu et al. 2001; Arikath et al. 2003; Tuluc et al. 2009; Ahern et al. 2001). The  $\alpha_2\delta-1$  subunit slows down the kinetics of activation of  $Ca_v1.1$  currents, while the  $\gamma_1$  subunit reduces the current amplitude and shifts the voltage-dependence of inactivation.

All these studies were performed in skeletal muscle cells using a knockout or knockdown approach, since  $Ca_v1.1$  expresses poorly in mammalian non-muscle cells. Whereas co-expression of the auxiliary subunits  $\beta$  and  $\alpha_2\delta$  is sufficient to support functional expression of all other high-voltage activated calcium channels (Singer et al. 1991; Lacerda et al. 1991; Zamponi et al. 2015),  $Ca_v1.1$  co-expression with these subunits does not yield functional currents in heterologous cell systems. Only recently, it was demonstrated that the skeletal muscle-specific adaptor protein STAC3 is essential for membrane expression and robust currents of  $Ca_v1.1$  in heterologous cells (Polster et al. 2015; Wu et al. 2018).

In the present study, we generated two HEK cell lines stably expressing the three subunits (STAC3,  $\beta_3$  and  $\alpha_2\delta-1$ ) necessary to support functional membrane expression of  $Ca_v1.1$ . These cell lines provide a unique

tool for analysis of wild-type and mutant Ca<sub>v</sub>1.1 channel currents and pharmacology in non-muscle cells. Interestingly, in contrast to what had been reported in myotubes, our current analysis of the adult and embryonic Ca<sub>v</sub>1.1 splice variants in the STAC3-HEK cell lines revealed no difference in current densities, while still displaying the typical differences in voltage dependence of activation. Because co-expression of  $\gamma_1$  inhibits the gating properties of Ca<sub>v</sub>1.1a calcium currents in skeletal muscle myotubes and in tsA201 cells (Polster et al. 2016; Freise et al. 2000; Ahern et al. 2001), and because the recent Ca<sub>v</sub>1.1 structure revealed an interaction of  $\gamma_1$  subunit with the IVS3-S4 loop of Ca<sub>v</sub>1.1a (Wu et al. 2016; Wu et al. 2015), we hypothesized that regulation of the gating properties of Ca<sub>v</sub>1.1 channels by the  $\gamma_1$  subunit occurs in a splice variant-dependent manner. Indeed, we found that co-expressed  $\gamma_1$  subunits selectively reduce the current density of the adult Ca<sub>v</sub>1.1a isoform, and not that of the embryonic Ca<sub>v</sub>1.1e isoform. In contrast,  $\gamma_1$  similarly shifted the voltage dependence of steady state inactivation to more negative voltages and increased Ca<sub>v</sub>1.1 membrane expression of both isoforms. Molecular modeling predicted several ionic interactions between the  $\gamma_1$  subunit and the IVS3-S4 linker of Ca<sub>v</sub>1.1a. However, site-directed mutagenesis of the putative ion-pair partners did not abolish  $\gamma_1$ -dependent inhibition of the Ca<sub>v</sub>1.1a currents, suggesting an allosteric effect of exon 29 that is important for modulation of current density by the  $\gamma_1$  subunit.

## Material and methods

### Generation of stable cell lines

Two HEK293 cell lines stably expressing mouse STAC3 were generated using the Flp-In T-Rex system (Invitrogen). Host cells, already expressing human  $\alpha_2\delta$ -1 and  $\beta_3$  subunits and containing a flippase recognition target (FRT) site, allowed the integration of STAC3 into the genome in a Flp recombinase-dependent manner. Briefly, the coding sequence of mouse STAC3 (Q8BZ71) was cloned into the pTO-HA-strepIII C GW FRT vector (containing a FRT site and a hygromycin resistance gene). To generate the cell line constitutively expressing STAC3 (**HEK-STAC3**), STAC3 expression was under the control of a CMV promoter. To generate the inducible STAC3 expression cell line (**HEK-TetOn-STAC3**), STAC3 expression was under the control of a CMV promoter with a tetracycline operator (TetOn) element. HEK293 host cells were transfected using the calcium phosphate method with either plasmid and a Flp recombinase-expressing vector (pOG44). Subsequently cells were selected with Hygromycin B (50  $\mu$ g/ml; catalog #CP12.2, Lactan/Roth) and selection agents for the other subunits (see below), and single positive cell clones were cultured and characterized. The electrophysiological experiments for the characterization of the cell lines were carried out using the TetOn-STAC3 cell line (Fig. 3, 4, 6 and S1).

## Cell culture and transfection

Cells were cultured in DMEM (catalog #41966052, invitrogen) supplemented with 10% fetal bovine serum (F9665, Sigma), 2 mM l-glutamine (25030-032, Invitrogen), 10 U/ml penicillin-streptomycin (15140122, Invitrogen), and were maintained at 37°C in a humidified incubator with 5% CO<sup>2</sup>. For maintenance of the stable cell lines, selection agents for each subunit were applied regularly [STAC3, 50 µg/ml hygromycin B; β<sub>3</sub>, 500 µg/ml geneticin (10131035, Gibco); and α<sub>2</sub>δ-1, 15 µg/ml blasticidin S (A1113903, Gibco)].

For electrophysiological experiments, cells were plated on 35 mm dishes coated with poly-l-lysine (catalog #P2636, Sigma-Aldrich) and simultaneously transfected with 2 µg of DNA using Fugene HD (catalog #E2312, Promega), accordingly to the manufacturer instructions. For the Tet-On cell line, STAC3 expression was induced using 1 µg/ml doxycycline upon transfection (catalog #3072, Sigma-Aldrich), and cells were kept at 5% CO<sup>2</sup> at 30°C. Cells were used for patch-clamp experiments 24–48 h after transfection/induction.

## Plasmids

Cloning procedures for GFP-Ca<sub>v</sub>1.1a and GFP-Ca<sub>v</sub>1.1e were previously described (Grabner, Dirksen, and Beam 1998; Tuluc et al. 2009).

Mouse γ<sub>1</sub> was cloned from genomic cDNA from mouse soleus muscle. Primer sequences were selected according to Genbank NM-007582. Briefly, the cDNA of γ<sub>1</sub> was amplified by PCR with a forward primer introducing a KpnI site upstream the starting codon (5′-ATATGGTACCATGTCCACAGACCAAAACAGCGAAG-3′) and the reverse primer introducing a Sall site after the stop codon (5′-ATATGTCGACGCTAGTGTCTGGCTCAGCGTCCATGCA-3′). The obtained PCR fragment, after KpnI/Sall digestion was inserted into the KpnI/XhoI digested pcDNA3 vector, yielding pcDNA3-γ<sub>1</sub>.

The 13-residue bungarotoxin binding site (BBS) was inserted in the IIS5-S6 loop of Ca<sub>v</sub>1.1a or Ca<sub>v</sub>1.1e at residue 593 by overlap extension PCR. Briefly the cDNA sequence of Ca<sub>v</sub>1.1 was amplified with overlapping primers in separate PCR reactions using GFP-Ca<sub>v</sub>1.1a as template. Primers used for the first fragment were:

fw (5′- TACATGAGCTGGATCACG-3′) and rev (5′- GTAGGGCTCCAGGGAGCTCTCGTAGTATCTCCAGTGTGCACTTCCGTGTCCTCGAAGTC -3′). Primers used for

the second fragment were: fw (5′- TACGAGAGCTCCCTGGAGCCCTACCCTGACGTACGTTTCGAGGACACGGAAGTCCGACGC -3′) and rev (5′- GAACACGCACTGGACCACG -3′). The two separate PCR products were then used as template for a final PCR

reaction with flanking primers to connect the nucleotide sequences. The resulting PCR fragment was then EcoRI/XhoI digested and inserted into the EcoRI/XhoI digested GFP-Ca<sub>v</sub>1.1a or GFP-Ca<sub>v</sub>1.1e, yielding GFP-Ca<sub>v</sub>1.1a-BBS or GFP-Ca<sub>v</sub>1.1e-BBS.

The R160A mutation was introduced by overlap extension PCR. Briefly the cDNA sequence of  $\gamma_1$  was amplified with overlapping primers mutating R160 into an alanine in separate PCR reactions using pcDNA3- $\gamma_1$  as template. Primers used for the first fragment were: fw (5'-ATATGGTACCATGTCACAGACCAAAACAGCGAAG-3') and rev (5'-CACCGACTGCGCCATGACCTCCACGGAGACGATGAG-3'). Primers used for the second fragment were: fw (5'-GAGGTCATGGCGCAGTCGGTGAAGCGTATGATTGAC-3') and rev (5'-ATATGTCGACGCTAGTGTCTGGCTCAGCGTCCATGCA-3'). The two separate PCR products were then used as template for a final PCR reaction with flanking primers to connect the nucleotide sequences. The resulting PCR fragment was then KpnI/SalI digested and inserted into the KpnI/XhoI digested pcDNA3 vector, yielding pcDNA3- $\gamma_1$ -R160A.

The K102A and E103A mutations were introduced by PCR. Briefly, the cDNA sequence of  $\gamma_1$  (nt 288-672) was amplified by PCR with a forward primer introducing the K102A and the E103A mutations downstream the EcoRI site and the reverse primer introducing an Apal site after the stop codon. Primers used were: fw (5'-TGAATTCACCACTCAAGCGGCGTACAGCATCTCAGCAGCGGCCATT-3') and rev (5'-AGAATAGGGCCCCCTCGACGCT-3'). The obtained PCR fragment, after EcoRI/Apal digestion was inserted into the EcoRI/Apal digested pcDNA3- $\gamma_1$  vector, yielding pcDNA3- $\gamma_1$ -K102A-E103A. To combine the three mutations we introduced the K102A and the E103A mutations as described above, but using  $\gamma_1$ -R160A as template for the PCR, yielding  $\gamma_1$ -R160A-K102A-E103A ( $\gamma_1$ -RK EAAA).

Sequence integrity of all newly generated constructs was confirmed by sequencing (MWG Biotech).

### **RT-PCR**

RNA was isolated from the three HEK293 cell lines after 48 h in culture using the RNeasy Protect Mini Kit (catalog #74124, Qiagen). After reverse transcription (Super-Script II reverse transcriptase, catalog #18064022, Invitrogen), the absolute number of transcripts in each sample was assessed by quantitative TaqMan PCR (Mm01159196\_m1, Thermo Fisher Scientific), using a standard curve generated from known concentrations of a PCR product containing the target of the assay as described previously (Rufenach et al., 2020).

### **Western Blotting**

Proteins isolated from the three HEK cell lines were prepared as previously described (Campiglio and Flucher, 2017). Briefly, cells plated in 100 mm dishes were trypsinized after 48 h in culture. Cells were lysed in RIPA buffer with a pestle and left on ice for 30 minutes. The lysates were then centrifuged for 10 minutes. The protein concentration was determined using a BCA assay (catalog #23250, Pierce). 20  $\mu$ g of

protein samples were loaded on a NuPage gel (4-12% polyacrylamide, catalog #NP0321, Invitrogen) and separated by SDS-PAGE at 160 V. The protein samples were then transferred to a PVDF membrane at 25 V and 100 mA for 3 h at 4°C with a semidry-blotting system (Roth). The membrane was then cut and incubated with rabbit anti-STAC3 (1:2,000; catalog #20392-1, Proteintech, RRID:AB\_10693618) or mouse anti-GAPDH (1:100,000; catalog #sc-32233, Santa Cruz Biotechnology, RRID:AB\_627679) antibodies overnight at 4°C and then with HRP-conjugated secondary antibody (1:5,000, Pierce) for 1 h at room temperature. The chemiluminescent signal was developed with ECL Supersignal WestPico kit (catalog #34579, Thermo Scientific) and detected with ImageQuant LAS 4000.

### **Immunocytochemistry**

The three HEK cell lines were plated on poly-lysine coated coverslips and fixed in paraformaldehyde at RT after 2 days in culture. Fixed cells were incubated in 5% normal goat serum in PBS/BSA/Triton for 30 min. The rabbit anti-STAC3 antibody (1:2,000) was applied overnight at 4°C and detected with Alexa-594-conjugated secondary antibody. During the last washing step, cells were incubated with Hoechst dye to stain nuclei. Preparations were analyzed on an Axioimager microscope (Carl Zeiss, Inc) using a ×63, 1.4 NA objective. Images were recorded with a cooled CCD camera (SPOT; Diagnostic Instruments) and Metamorph image processing software (Universal Imaging, Corp.). Images were arranged in Adobe Photoshop 9 (Adobe Systems Inc.), and linear adjustments were performed to correct black level and contrast. To quantify the fluorescence intensity of the STAC3 staining, 14-bit gray scale images of the red (STAC3) and blue (Hoechst) channels were acquired for each cell line. A region of interest was manually traced around each cell in the STAC3 staining image, its intensity was recorded and background corrected using Metamorph. For each condition, between 15 and 31 cells were analyzed from each of three independent experiments.

### **Labelling of cell surface Cav1.1 channels with QD<sub>655</sub>**

For cell-surface labeling a 13 amino acid high affinity bungarotoxin (BTX) binding site was inserted into Cav1.1a and Cav1.1e as described (Yang et al. 2010) and expressed in HEK-293 cells. 48h hours after transfection, cells were resuspended from 35 mm dishes with ice-cold PBS<sup>++</sup> containing calcium and magnesium (pH 7.4, 0.9 mM CaCl<sub>2</sub>, 0.49 mM MgCl<sub>2</sub>), washed and incubated with 5 μM biotinylated α-bungarotoxin (catalog #B1196, Invitrogen) in PBS<sup>++</sup>/3% BSA in the dark for 1 h on ice. Cells were washed twice with PBS<sup>++</sup>/3% BSA and incubated with 10 nM streptavidin-conjugated quantum dots (QD<sub>655</sub>, catalog #Q10121MP, Invitrogen) in the dark for 1h on ice. Finally, cells were washed twice with PBS<sup>++</sup>/3% BSA and either assayed in flow cytometry or plated on poly-L-lysine coated coverslips and imaged.

## Microscopy

Cells were imaged in Tyrode's physiological solution using a 63x, 1.4 NA objective Axioimager microscope (Carl Zeiss). 14-bit images were recorded with a cooled CCD camera (SPOT, Diagnostic Instruments) and Metaview image processing software (Universal Imaging). Image composites were arranged in Adobe photoshop CS6.

## Multiparameter flow cytometry

Labeled cells were counted by flow cytometry using a BD FACSVerse analyzer (Becton Dickinson, Franklin Lakes, NJ). For flow cytometric analyses, labeled cells were counted and analyzed using BD FACSuite v1.0.6 and BD FACS Diva v9.0 software (Becton Dickinson, Franklin Lakes, NJ). Cells expressing GFP were excited at 488nm and red signal was excited at 633nm. For each set of experiments untransfected or unlabeled cells, as well as single color controls, were used to adjust threshold values and setting were then used for analyzing all samples.

## Electrophysiology

Calcium currents in HEK cells were recorded with the whole-cell patch-clamp technique in voltage-clamp mode using an Axopatch 200A amplifier (Axon Instruments). Patch pipettes (borosilicate glass; Science Products) had resistances between 1.8 and 4.0 M $\Omega$  when filled with (mM) 135 CsCl, 1 MgCl<sub>2</sub>, 10 HEPES, 10 EGTA and 4 ATP-Na<sub>2</sub> (pH 7.4 with CsOH). The extracellular bath solution contained (mM) 15 CaCl<sub>2</sub>, 150 choline-chloride, 10 HEPES, and 1 Mg-Cl<sub>2</sub> (pH 7.4 with CsOH). Data acquisition and command potentials were controlled by pCLAMP software (Clampex version 10.2; Axon Instruments); analysis was performed using Clampfit 10.7 (Axon Instruments) and SigmaPlot 12.0 (SPSS Science) software. The current-voltage dependence of activation was determined using 300 or 500 ms long square pulses to various test potentials (holding potential -80 mV) and curves were fitted according to:

$$I = G_{\max} * (V - V_{\text{rev}}) / (1 + \exp(-(V - V_{1/2})/k))$$

where  $G_{\max}$  is the maximum conductance,  $V_{\text{rev}}$  is the extrapolated reversal potential,  $V_{1/2}$  is the potential for half maximal activation, and  $k$  is the slope. The conductance was calculated using  $G = (-I * 1000) / (V_{\text{rev}} - V)$ , and its voltage dependence was fitted according to a Boltzmann distribution:

$$G = G_{\max} / (1 + \exp(-(V - V_{1/2})/k))$$

Steady-state inactivation was calculated as the ratio between two current amplitudes elicited by 200 ms pulses to  $V_{\max}$  separated by a 15 second conditioning pulse to various test potentials (sweep start-to-start



interval 30 seconds; see inset Fig. 4A). Steady-state inactivation curves were fitted using a modified Boltzmann equation:

$$I = (1 - I_{\text{steady-state}}) / (1 + \exp((V - V_{1/2})/k)) + I_{\text{steady-state}}$$

where  $V_{1/2}$  is the half-maximal inactivation voltage and  $k$  is the inactivation slope factor.

All experimental groups were analyzed in transiently transfected cells from at least three independent cell passages. The means, standard errors (SEM), and p-values were calculated using the Student's t-test, 2-tailed, with significance criteria  $p < 0.05$  \*,  $p < 0.01$  \*\*,  $p < 0.001$  \*\*\* and  $p < 0.0001$  \*\*\*\*. P-values of the experiments where more than 2 groups are compared to each other were calculated using the ANOVA and Tukey's or Sidak's posthoc test.

### Structure modeling

The complex structures of both splice variants of the human  $\alpha 1$ -subunit (Ca<sub>v</sub>1.1e and Ca<sub>v</sub>1.1a) and the  $\gamma 1$ -subunit were modelled based on the rabbit cryo-electron microscopy (EM) structure of Ca<sub>v</sub>1.1 in the inactivated state, with voltage sensors in the 'up' conformation and a closed intracellular gate (PDB accession code: 5GJV) (Wu et al. 2016). Homology modelling has been performed using MOE (Molecular Operating Environment, version 2018.08, Molecular Computing Group Inc., Montreal, Canada). Additionally, ab initio Rosetta modelling was used to generate structures for loops that were not resolved in the original Ca<sub>v</sub>1.1  $\alpha 1$ -subunit and  $\gamma 1$ -subunit template (Rohl et al. 2004). The structures for the putative mutants were derived from both WT splice variant models by replacing the mutated residue and carrying out a local energy minimization using MOE. The C-terminal and N-terminal parts of each domain were capped with acetylamide (ACE) and N-methylamide to avoid perturbations by free charged functional groups. The structure model was embedded in a plasma membrane consisting of POPC (1-palmitoyl-2-oleoyl-sn-glycero-3-phosphocholine) and cholesterol in a 3:1 ratio, using the CHARMM-GUI Membrane Builder (Lee et al. 2019; Jo et al. 2009). Water molecules and 0.15 M KCl were included in the simulation box. Energy minimizations of Ca<sub>v</sub>1.1e and Ca<sub>v</sub>1.1a WT and mutant structures in the membrane environment were performed. The topology was generated with the LEaP tool of the AmberTools18 (Case et al. 2008), using force fields for proteins and lipids, ff14SBonlysc and Lipid14 (Dickson et al. 2014), respectively. The structure models were heated from 0 to 300 K in two steps, keeping the lipids fixed, and then equilibrated over 1 ns. Then molecular dynamics simulations were performed for 10 ns, with time steps of 2 fs, at 300 K and in anisotropic pressure scaling conditions. Van der Waals and short-range electrostatic interactions were cut off at 10 Å, whereas long-range electrostatics were calculated by the Particle Mesh Ewald (PME) method (Salomon-Ferrer et al. 2013). As the extracellular loop 1 was not resolved in the Cryo-EM structure, we modelled 100 loop structures with Rosetta ab initio modelling (Rohl

et al. 2004). By clustering on the loops using a RMSD distance criterion of 2 Å, we obtained 10 clusters. These 10 clusters were carefully evaluated and the energetically most favorable two cluster representatives, which formed interactions with the S3-S4 loop of VSD IV (exon 29), were considered for further minimizations in the membrane environment. MOE and Pymol was used to visualize the key interactions and point out differences in structure models (The PyMOL Molecular Graphics System, Version 2.0 Schrödinger, LLC.).

### Online supplementary material

Fig. S1 shows the activation and inactivation kinetics analysis pertaining to Fig. 3. Table S1 summarizes electrophysiological parameters pertaining to Fig.2. Table S2 summarizes electrophysiological parameters pertaining to Fig.3 and Fig. S1. Table S3 summarizes electrophysiological parameters pertaining to Fig.6.

## Results

### Generation of two HEK cell lines expressing $\beta_3$ , $\alpha_2\delta$ -1 and STAC3.

In order to generate HEK293 cell lines that could reliably support  $\text{Ca}_v1.1$  expression, we inserted STAC3 into the genome of a host cell line already stably expressing  $\alpha_2\delta$ -1 and  $\beta_3$  using the Flp-In T-Rex system. We generated two cell lines: one in which the expression of STAC3 was constitutive (HEK-STAC3) and one in which the expression of STAC3 was doxycycline (DOX) inducible (HEK-TetOn-STAC3). While the parental HEK cell line showed neither STAC3 mRNA nor protein expression, the selected clone of the constitutive HEK-STAC3 cell line strongly expressed STAC3 (Fig 1). As expected, without DOX induction the selected clone of the inducible HEK-TetOn-STAC3 cell line showed only weak basal STAC3 mRNA and protein expression. However, 24 h after the beginning of DOX induction, STAC3 expression levels were strongly increased and comparable to those of the constitutive HEK-STAC3 cell line (Fig. 1).

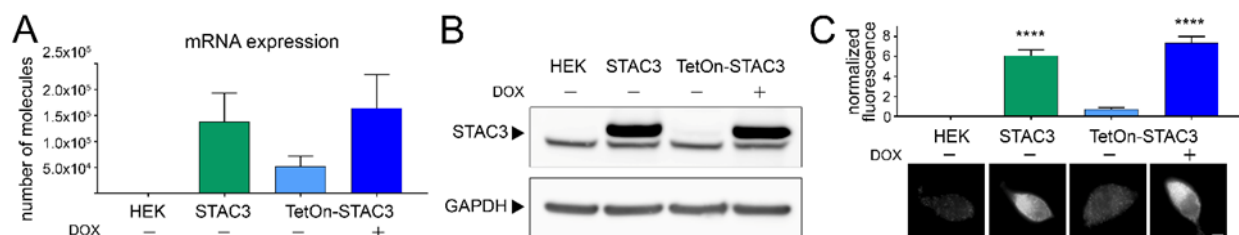

**Figure 1. Both the constitutive and the inducible STAC3-HEK cell lines robustly express STAC3. (A)** STAC3 mRNA transcription levels in the host (HEK), the constitutive (STAC3), and the inducible cell line (TetOn-STAC3), before and after doxycycline (DOX) treatment, assessed by TaqMan quantitative PCR. Mean values of three replicates. **(B)** Western blot analysis with anti-STAC3 antibody indicated that STAC3 is substantially expressed by the constitutive

and the inducible cell lines (treated with DOX), while it is absent from the host cell line (HEK). Without DOX the inducible cell line shows very low basal expression. A non-specific band present in all samples migrates slightly fast than STAC3. One representative experiment of three is shown. **(C)** Quantification of STAC3 staining intensity in the host (HEK), the constitutive (STAC3), and the inducible cell line (TetOn-STAC3), before and after DOX treatment reveals a strong STAC3 expression in both STAC3 and TetOn-STAC3 cell lines. Scale bar, 2  $\mu\text{m}$ . ANOVA,  $F(3,169)=67.72$ ;  $P<0.0001$ ; Tukey post hoc analysis \*\*\*\* $P<0.0001$ .

We then analyzed the ability of the cell lines to support the expression of functional  $\text{Ca}_v1.1$  currents by transient transfection with the adult  $\text{Ca}_v1.1a$  or the embryonic  $\text{Ca}_v1.1e$  isoforms. The two  $\text{Ca}_v1.1$  isoforms differ in the length of the linker connecting helices S3 and S4 of the fourth homologous repeat, with the embryonic isoform skipping exon 29 and lacking 19 amino acids. Although both isoforms support skeletal muscle EC coupling, they display very different current properties when expressed in dysgenic ( $\text{Ca}_v1.1$ -null) myotubes. In contrast to the adult  $\text{Ca}_v1.1a$  isoform, the embryonic  $\text{Ca}_v1.1e$  splice variant activates at more hyperpolarizing potentials and conducts calcium currents that are several-fold larger than those of  $\text{Ca}_v1.1a$  (Tuluc et al. 2009). Our experiments show that both the constitutive (HEK-STAC3) and the inducible (HEK-TetOn-STAC3) cell lines efficiently supported functional expression of both the adult and the embryonic  $\text{Ca}_v1.1$  variants (Fig. 2A-B and 2E-F, Table S1). More interestingly, while the two  $\text{Ca}_v1.1$  splice variants displayed the expected difference in the  $V_{1/2}$  of activation (Fig. 2C-D and 2G-H, Table S1), the expected smaller current density in  $\text{Ca}_v1.1a$  was not observed in the two STAC3-HEK cell lines (Fig. 2A-B, and 2E-F, Table S1).

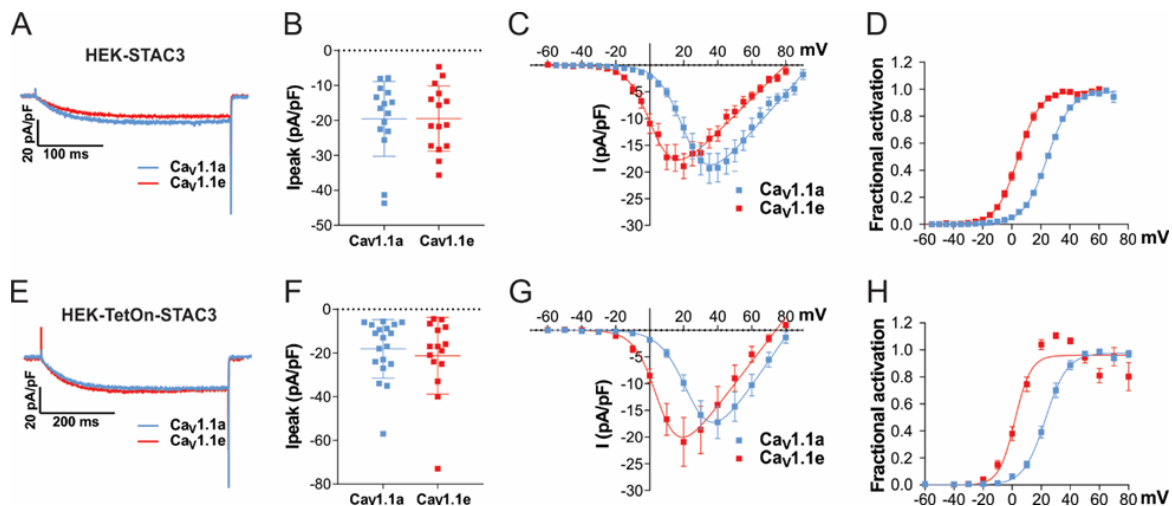

**Figure 2. Exclusion of exon 29 in  $\text{Ca}_v1.1e$  shifts the voltage dependence of activation to more negative voltages but does not affect current density in either of the two STAC3-HEK cell lines. (A-D)** Current properties of  $\text{Ca}_v1.1a$  (blue,  $n=15$ ) compared to  $\text{Ca}_v1.1e$  (red,  $n=15$ ) in the HEK-STAC3 cell line. **(E-H)** Current properties of  $\text{Ca}_v1.1a$  (blue,  $n=19$ ) compared to  $\text{Ca}_v1.1e$  (red,  $n=15$ ) in the inducible cell line HEK-TetOn-STAC3 treated with DOX. **(A, E)** Exemplary current traces at  $V_{\text{max}}$  show similar activation kinetics of the  $\text{Ca}_v1.1a$  and  $\text{Ca}_v1.1e$  variants and no difference in the peak current density ( $I_{\text{peak}}$ ; peak current normalized to the cell size) in both the HEK-STAC3 **(B)** and HEK-TetOn-STAC3 **(F)** cell lines ( $p=0.94$  and  $p=0.56$ , respectively). **(C, G)** The current-voltage relationship and **(D, H)** the normalized

steady-state activation curves show that exclusion of exon 29 (in Ca<sub>v</sub>1.1e) results in a 20.6 mV and 21.1 mV left shift of activation when expressed in the HEK-STAC3 and HEK-TetOn-STAC3 cell line, respectively. Mean±SEM; P-values calculated with Student's t-test (see Table S1 for parameters and statistics).

We reasoned that some factor is missing in HEK cells that specifically mediates the splicing-dependent effect on the current amplitude in muscle cells. Because in muscle the specific function of exon 29 is to curtail the calcium currents and in our STAC3-HEK cells the currents were equally large, the missing factor might be a muscle-specific protein capable of diminishing Ca<sub>v</sub>1.1 currents specifically in the adult splice variant. The only Ca<sub>v</sub>1.1 subunit not present in our expression system is the  $\gamma_1$  subunit. Moreover, the  $\gamma_1$  subunit acts as a negative regulator of Ca<sub>v</sub>1.1 currents both in skeletal muscle and in tsA201 cells (Freise et al. 2000; Ahern et al. 2001; Andronache et al. 2007; Polster et al. 2016) and its expression is restricted to skeletal muscle (Biel et al. 1991; Jay et al. 1990). Therefore, we inferred that the  $\gamma_1$  subunit may be the missing factor selectively reducing the currents of Ca<sub>v</sub>1.1a and not those of Ca<sub>v</sub>1.1e. This notion was further supported by the fact that cryo-EM structures of Ca<sub>v</sub>1.1 predicted an interaction of the  $\gamma_1$  subunit with the Ca<sub>v</sub>1.1 IVS3-S4 region, exactly the site containing the alternatively spliced exon 29 (Wu et al. 2016; Wu et al. 2015).

#### **The $\gamma_1$ subunit selectively reduces the current density of Ca<sub>v</sub>1.1a but not that of Ca<sub>v</sub>1.1e.**

To test this hypothesis, we measured the calcium current density of Ca<sub>v</sub>1.1a and Ca<sub>v</sub>1.1e in the presence and the absence of  $\gamma_1$  in one of the newly established cell lines (HEK-TetOn-STAC3). As previously reported (Polster et al. 2016; Freise et al. 2000), the presence of  $\gamma_1$  significantly reduced Ca<sub>v</sub>1.1a current amplitudes, with no significant effect on the voltage dependence of activation (Fig. 3A-D and Table S2). The activation kinetics were unaltered by co-expression of the  $\gamma_1$  subunit (Fig. S1A-D, Table S2), in agreement to what had been observed in myotubes (Freise et al. 2000), but contrary to what was previously reported in tsA201 cells (Polster et al. 2016). More importantly, as hypothesized, in contrast to Ca<sub>v</sub>1.1a, co-expression of  $\gamma_1$  had no effect on the current density of Ca<sub>v</sub>1.1e (Fig. 3E-H, Table S2), suggesting that the inclusion of the 19 amino acids encoded in exon 29 is essential for suppression of the Ca<sub>v</sub>1.1 current by the  $\gamma_1$  subunit.

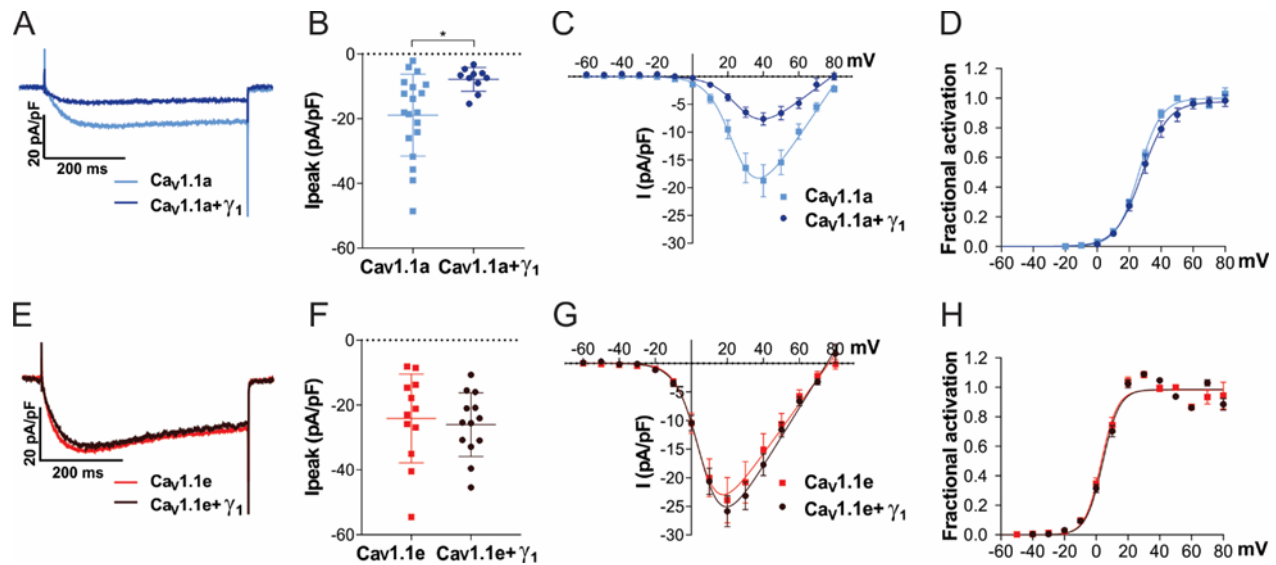

**Figure 3. Co-expression of  $\gamma_1$  reduces the current density in Cav1.1a but not in Cav1.1e.** (A-D) Current properties of the adult splice variant Cav1.1a (blue,  $n=19$ ) compared to Cav1.1a co-expressed with  $\gamma_1$  (Cav1.1a +  $\gamma_1$ , dark blue,  $n=10$ ). (E-H) Current properties of the embryonic splice variant Cav1.1e (red,  $n=12$ ) compared to Cav1.1e +  $\gamma_1$  (dark red,  $n=13$ ). (A) Exemplary current traces at  $V_{max}$  and (B) the scatter plot of the peak current density ( $I_{peak}$ ) show a significant reduction ( $p=0.012$ ) when co-expressing  $\gamma_1$  with Cav1.1a. On the contrary, when co-expressing  $\gamma_1$  with Cav1.1e (E-F), no difference in current density was observed ( $p=0.69$ ). (C, G) The current-voltage relationship and (D, H) the fractional steady-state activation curves show no effect of  $\gamma_1$  on the voltage dependence of activation when co-expressed with Cav1.1a or Cav1.1e. Mean $\pm$ SEM;  $P$ -values calculated with Student's t-test. \*  $P<0.05$  (for parameters and statistics see Table S2).

### The $\gamma_1$ subunit shifts the steady state inactivation to more negative potentials and decreases the window current of both Cav1.1 isoforms.

The  $\gamma_1$  subunit inhibits Cav1.1 currents not only by decreasing the current amplitude, but also by limiting Cav1.1 window current, i.e. the overlapping area between activation and inactivation curves. In fact, previous studies demonstrated that, in the presence of  $\gamma_1$ , the voltage-dependence of inactivation shifted toward more negative potentials, while the voltage-dependence of activation remained unaltered (Ahern et al. 2001; Freise et al. 2000; Held et al. 2002; Ursu et al. 2004).

To determine if this  $\gamma_1$  effect on Cav1.1 currents is also restricted to the adult Cav1.1a isoform, we performed a steady state inactivation protocol comparing the current size of test pulses before and after 15 s conditioning pre-pulses at incrementally increasing potentials (inset in Fig. 4A). The normalized steady-state inactivation is plotted as a function of the pre-pulse potential. As previously demonstrated, co-expression of the  $\gamma_1$  subunit resulted in a robust left-shift in the voltage-dependence of inactivation of the adult Cav1.1a isoform (Fig. 4A). In the presence of  $\gamma_1$ , the half-maximal inactivation potential was shifted by 18.5 mV toward more hyperpolarizing potentials (Fig. 4B, Table S2), and inactivation was more complete compared to Cav1.1a alone (Table S2). Consequently, the window current was decreased (even

without considering the reduced current density in this voltage range) and peaked at  $\approx 20$  mV, as compared to  $\approx 30$  mV  $\text{Ca}_v1.1a$  without  $\gamma_1$  (Fig 4C-D, Table S2).

Surprisingly, these  $\gamma_1$  effects were recapitulated with the embryonic  $\text{Ca}_v1.1e$  isoform. In the presence of the  $\gamma_1$  subunit, the half maximal inactivation potential was shifted to hyperpolarizing potentials by 17.8 mV and steady-state inactivation was almost complete (Fig- 4E-F, Table S2). Because this left-shift of inactivation was not accompanied by a similar shift of  $V_{1/2}$  of activation the window current was decreased by several-fold and peaked at  $\approx -10$  mV, as compared to  $\approx 0$  mV in  $\text{Ca}_v1.1e$  without  $\gamma_1$  (Fig 4G-H). These results suggest that, while the  $\gamma_1$  subunit fails to suppress the current of the embryonic  $\text{Ca}_v1.1e$  splice variant by reducing its amplitude (Fig. 3A-C), it still inhibits  $\text{Ca}_v1.1e$  currents like in  $\text{Ca}_v1.1a$ , by left-shifting the steady state inactivation and causing more complete inactivation, thus reducing the window current.

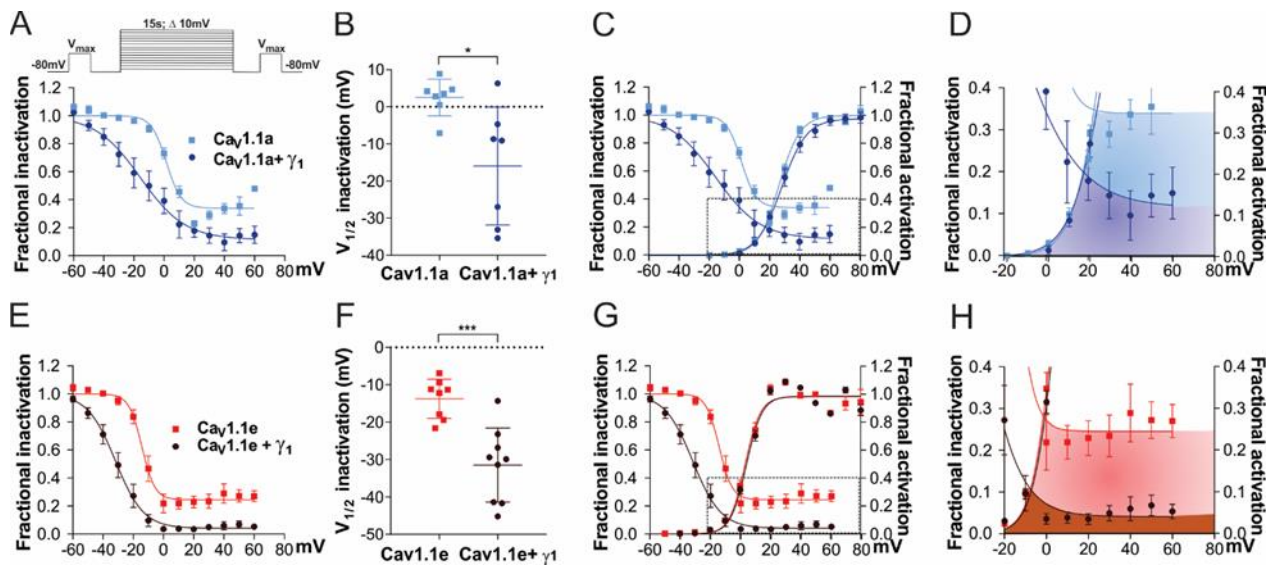

**Figure 4.  $\gamma_1$  left shifts the steady state inactivation and reduces the window currents in both  $\text{Ca}_v1.1a$  and  $\text{Ca}_v1.1e$ .** (A-D) Steady-state inactivation and window currents of  $\text{Ca}_v1.1a$  (blue,  $n=7$ ) compared to  $\text{Ca}_v1.1a + \gamma_1$  (dark blue,  $n=7$ ); (E-H) the same for  $\text{Ca}_v1.1e$  (red,  $n=8$ ) and  $\text{Ca}_v1.1e + \gamma_1$  (dark red,  $n=9$ ). (A and B, E and F) Fractional inactivation curves and scatter plot of  $V_{1/2}$  of inactivation show that, compared to  $\text{Ca}_v1.1a$  and  $\text{Ca}_v1.1e$  without  $\gamma_1$  expression, the voltage-dependence of inactivation is left-shifted in  $\text{Ca}_v1.1a + \gamma_1$  (18.5 mV,  $p=0.013$ ) and  $\text{Ca}_v1.1e + \gamma_1$  (17.8 mV,  $p<0.001$ ). The inset in (A) shows the steady state inactivation protocol. (C, G) Superposition of the fractional activation and inactivation curves (same as in panels A and E) shows that, while the activation of  $\text{Ca}_v1.1a + \gamma_1$  and  $\text{Ca}_v1.1e + \gamma_1$  is not shifted, the left shift in inactivation results in greatly decreased window currents. (D, H) The enlarged areas indicated by the frames (in C and G) show the size and voltage-range of the window currents for  $\text{Ca}_v1.1a$  (shaded in blue),  $\text{Ca}_v1.1a + \gamma_1$  (dark blue),  $\text{Ca}_v1.1e$  (red) and  $\text{Ca}_v1.1e + \gamma_1$  (dark red). Mean $\pm$ SEM;  $P$ -values calculated with Student's  $t$ -test. \*  $P<0.05$ , \*\*\*  $P<0.001$ .

The  $\gamma_1$  subunit was also reported to accelerate the inactivation kinetics of  $\text{Ca}_v1.1$  (Ahern et al. 2001; Freise et al. 2000). Accordingly, the time constant of the slow component of inactivation of  $\text{Ca}_v1.1a$  was significantly reduced in the presence of  $\gamma_1$  (Fig. S1E-H, Table S2). On the other hand, the time constant of the slow component of inactivation of the embryonic isoform  $\text{Ca}_v1.1e$  is already significantly faster than



that of the adult  $\text{Ca}_v1.1a$  isoform ( $\text{Ca}_v1.1e$ : 2.9 s;  $\text{Ca}_v1.1$ : 7.8 s), as previously reported (Tuluc et al. 2009). Co-expression of  $\gamma_1$  further accelerates the kinetics of inactivation of  $\text{Ca}_v1.1e$ , although not to a statistically significant extent (Fig. S1E-H and Table S2).

### **The $\gamma_1$ subunit increases membrane expression of both $\text{Ca}_v1.1$ isoforms.**

$\text{Ca}_v1.1$  is the only one out of the ten voltage-gated calcium channels that expresses poorly in non-muscle cells, unless the adaptor protein STAC3 is co-expressed (Polster et al. 2015). Recently it was shown that also the  $\gamma_1$  subunit supports robust membrane expression of  $\text{Ca}_v1.1a$  in tsA201 cells; although in the absence of STAC3 these channels produce only very small calcium currents (Polster et al. 2016). To examine whether the  $\gamma_1$  subunit supports only the membrane targeting of the adult  $\text{Ca}_v1.1a$  isoform or also of the embryonic  $\text{Ca}_v1.1e$ , we established a dual-labelling approach, originally developed by the lab of Henry Colecraft (Fang and Colecraft 2011; Yang et al. 2010), to identify and quantify membrane inserted  $\text{Ca}_v1.1$  channels. To this end, a 13 amino acid high affinity bungarotoxin (BTX) binding site (BBS) was introduced into the extracellular IIS5-IIS6 domain of GFP- $\text{Ca}_v1.1a$  and GFP- $\text{Ca}_v1.1e$ . Then the channels expressed on the cell surface of HEK cells (expressing  $\beta_3$  and  $\alpha_2\delta-1$ ) were labeled by exposing non-permeabilized living cells to biotinylated bungarotoxin and subsequently to streptavidin-coated quantum dots (QD<sub>655</sub>) (Fig. 5A). Hence, the GFP fluorescence of a cell measures the total  $\text{Ca}_v1.1$  expression, while the QD<sub>655</sub> fluorescence quantifies the fraction of surface-expressed  $\text{Ca}_v1.1$  channels.

In cells expressing  $\text{Ca}_v1.1a$  alone, we detected minimal QD<sub>655</sub> fluorescence in the plasma membrane. By contrast, co-expression of STAC3 or  $\gamma_1$ , individually or together, all resulted in robust  $\text{Ca}_v1.1a$  membrane targeting (Fig. 5B). In order to quantify membrane inserted  $\text{Ca}_v1.1$  channels, we used flow cytometry analysis, which allows measuring the fluorescence signals of a multitude of individual cells (Fig. 5D). This analysis confirmed the lack of a robust QD<sub>655</sub> fluorescence signal in cells expressing only GFP- $\text{Ca}_v1.1a$ , but displayed strong QD<sub>655</sub> fluorescence in cells co-expressing GFP- $\text{Ca}_v1.1a$  together with STAC3,  $\gamma_1$ , or both. In four independent experiments, cells co-expressing STAC3 on average displayed a 140% increase of surface expressed  $\text{Ca}_v1.1a$ , cells co-expressing  $\gamma_1$  an 80% increase, while cells expressing both, STAC3 and  $\gamma_1$  subunits, displayed a 180% increase compared to cells expressing  $\text{Ca}_v1.1a$  alone (Fig. 5F). These results corroborate the importance of STAC3 and  $\gamma_1$  for  $\text{Ca}_v1.1a$  plasma membrane expression (Niu et al. 2018; Polster et al. 2016; Polster et al. 2015).

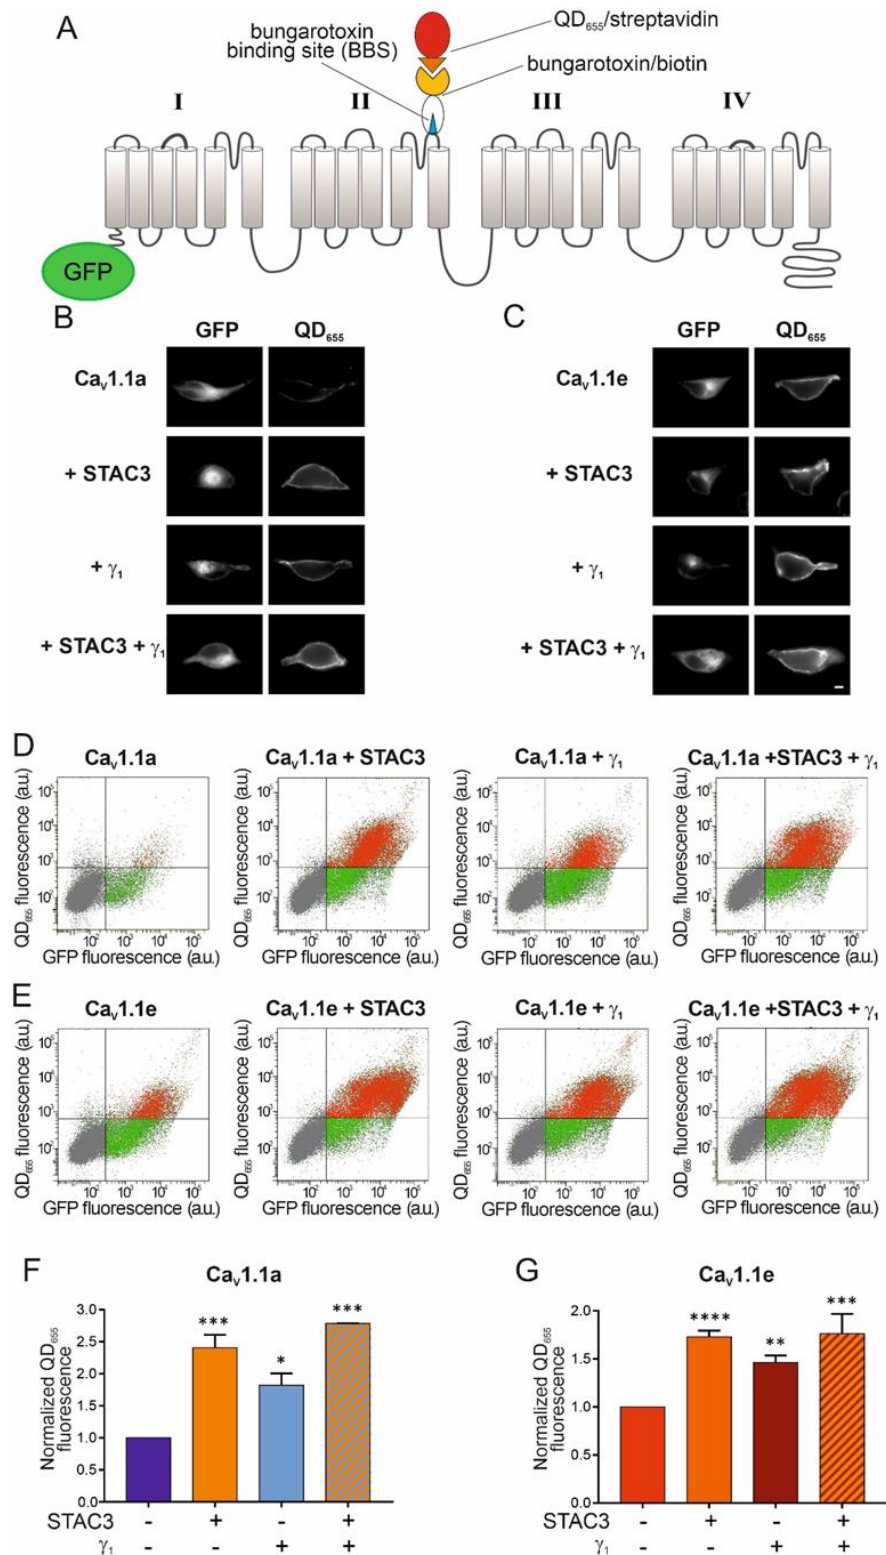

**Figure 5.  $\gamma_1$  increases the surface density of both Ca<sub>v</sub>1.1a and Ca<sub>v</sub>1.1e isoforms.** (A) Scheme displaying the strategy to detect Ca<sub>v</sub>1.1 channels expressed on the plasma membrane of HEK cells (stably expressing  $\beta_3$  and  $\alpha_2\delta$ -1). The introduction of the 13 amino acid BBS in the extracellular domain of GFP-Ca<sub>v</sub>1.1a or GFP-Ca<sub>v</sub>1.1e allowed the selective labelling of channels in the membrane by sequentially incubating the non-permeabilized cells with biotinylated bungarotoxin and streptavidin-conjugated quantum dots (QD<sub>655</sub>). (B) From top to bottom,



representative images of HEK cells expressing the adult GFP-Ca<sub>v</sub>1.1a isoform alone, with STAC3, with  $\gamma_1$ , and with both STAC3 and  $\gamma_1$ . **(C)** The same for HEK cells expressing the embryonic GFP-Ca<sub>v</sub>1.1e isoform. Scale bar, 2  $\mu$ m. **(D-E)** Representative raw data from flow cytometry experiments showing the GFP and the QD<sub>655</sub> signal for cells expressing GFP-Ca<sub>v</sub>1.1a **(D)** or GFP-Ca<sub>v</sub>1.1e **(E)** alone, with STAC3, with  $\gamma_1$ , and with both STAC3 and  $\gamma_1$ . The vertical and horizontal lines represent threshold values determined using untransfected cells, untreated cells, and cells exposed only to QD<sub>655</sub>. Single cells are depicted as dots, which have been colored in grey (untransfected), in green (transfected, lacking surface expression) or in red (transfected, with appreciable surface expression). **(F-G)** Normalized mean QD<sub>655</sub> fluorescence signals across separate flow cytometry experiments (N=4). Data were normalized to the QD<sub>655</sub> signals of cells expressing only GFP-Ca<sub>v</sub>1.1. In **(F)** the conditions with STAC3 (\*\*\*, p=0.0003),  $\gamma_1$  (\*, p=0.0143), and STAC3 +  $\gamma_1$  (\*\*\*, p=0.0002) are significantly different from the control GFP-Ca<sub>v</sub>1.1a using one-way ANOVA and Tukey post hoc mean comparison. In **(G)** the conditions with STAC3 (\*\*\*\*, p<0.0001),  $\gamma_1$  (\*\*, p=0.0019), and STAC3 +  $\gamma_1$  (\*\*\*, p=0.0002) are significantly different from the control GFP-Ca<sub>v</sub>1.1e using one-way ANOVA and Tukey post hoc mean comparison.

We then analyzed the effect of the STAC3 and  $\gamma_1$  subunits on membrane expression of the embryonic Ca<sub>v</sub>1.1e isoform. In contrast to the adult isoform, the embryonic Ca<sub>v</sub>1.1e channel showed a substantial membrane staining also when expressed alone (Fig. 5C top, 5E left). Nevertheless, co-expression of STAC3 and  $\gamma_1$ , individually or together, further increased the amount of QD<sub>655</sub> fluorescence (Fig. 5C, 5E). In four independent experiments, cells co-expressing STAC3 displayed a 70% increase of surface-expressed Ca<sub>v</sub>1.1e, cells co-expressing  $\gamma_1$  a 50% increase, while the ones expressing both, STAC3 and  $\gamma_1$  subunits, displayed an 80% increase compared to cells expressing Ca<sub>v</sub>1.1e alone (Fig. 5G).

All together, these results demonstrate that, while the  $\gamma_1$  subunit fails to modulate the current amplitude of the embryonic Ca<sub>v</sub>1.1e isoform, it still modulates its steady-state inactivation and surface trafficking. Moreover, the reduction of current density induced by  $\gamma_1$  cannot be explained by reduced channel availability at the cell surface.

### **Ca<sub>v</sub>1.1- $\gamma_1$ ion-pair partners predicted by structure modeling are not essential for Ca<sub>v</sub>1.1a-specific current reduction by $\gamma_1$**

Since the recent cryo-EM structure of Ca<sub>v</sub>1.1 revealed that the  $\gamma_1$  subunit interacts with IVS3-S4 (Wu et al. 2016; Wu et al. 2015) and because we found that  $\gamma_1$  fails to inhibit the current amplitude of the embryonic Ca<sub>v</sub>1.1e isoform (Fig. 2E), which lacks 19 amino acids in the IVS3-S4 linker, we hypothesized that  $\gamma_1$  and the IVS3-S4 linker of Ca<sub>v</sub>1.1a may establish an interaction responsible for the current inhibition in Ca<sub>v</sub>1.1a. In order to identify putative interaction partners between the IVS3-S4 linker and  $\gamma_1$ , we generated a structural model of the Ca<sub>v</sub>1.1 channel based on the published cryo-EM structure (Wu et al. 2016) (Fig. S2). We used the Rosetta computational modeling software (Bender et al. 2016; Rohl et al. 2004) to model the structure of the IVS3-S4 linker of Ca<sub>v</sub>1.1a. The resulting structure predicts a putative interaction of residues D1223 and D1225 of the IVS3-S4 linker of Ca<sub>v</sub>1.1a with residue R160 in the second extracellular loop of the  $\gamma_1$  subunit (Fig. 6A, Fig. S2). To test whether the observed inhibition of the Ca<sub>v</sub>1.1a current amplitude by  $\gamma_1$  is

dependent on this ionic interaction, we performed site-directed mutagenesis to substitute the involved residues with alanines, which deletes all interactions made by side-chain atoms beyond the  $\beta$  carbon (Wells 1991). However, mutation of residue R160 of the  $\gamma_1$  subunit to an alanine did not diminish its ability to inhibit the current amplitude of  $\text{Ca}_v1.1a$  (Fig. 6A-D, Table S3). Also simultaneously mutating both D1223 and D1225 of  $\text{Ca}_v1.1a$  did not alter the ability of  $\gamma_1$  to reduce the current amplitude of  $\text{Ca}_v1.1a$  (Fig. 6E-H, Table S3). Together these results indicate that this putative interaction between the IVS3-S4 linker of  $\text{Ca}_v1.1a$  and the  $\gamma_1$  subunit is dispensable for current amplitude inhibition by  $\gamma_1$ .

Previously it has been suggested that the N-terminal half of the  $\gamma_1$  subunit, including the first two transmembrane domains, mediates its interaction with the calcium channel and is responsible for suppressing the current amplitude of  $\text{Ca}_v1.1$  (Arikkath et al. 2003). Because the analyzed R160A mutation is located in the C-terminal half of the  $\gamma_1$  subunit protein, we modeled the structure of the extensive extracellular loop located in the first half of the  $\gamma_1$  subunit and searched it for further possible interaction sites. We identified putative ionic interactions of residues D1225 and R1229 in the IVS3-S4 linker of  $\text{Ca}_v1.1a$  with the K102 and E103 positioned in the first extracellular domain of the  $\gamma_1$  subunit (Fig. 6I, Table S3, Fig. S2). However, mutation of K102 and E103 to alanines did not alter the ability of  $\gamma_1$  to inhibit the calcium channel current amplitude (Fig. 6J-L, Table S3). Finally, to exclude the possibility that the interaction between the IVS3-S4 linker of  $\text{Ca}_v1.1a$  with either one of the two extracellular loops of  $\gamma_1$  were sufficient to suppress the calcium channel current amplitude, we combined the R160A and the K102A/E103A mutations (Fig. 6M). However, also this triple-mutant  $\gamma_1$  was capable of inhibiting the current amplitude of  $\text{Ca}_v1.1a$  to similar levels as the wild-type  $\gamma_1$  (Fig. 6N-P, Table S3). Together these mutagenesis experiments indicate that the current-inhibiting effect of  $\gamma_1$  is not mediated by direct ionic interactions between  $\gamma_1$  and the IVS3-S4 loop of  $\text{Ca}_v1.1a$ .

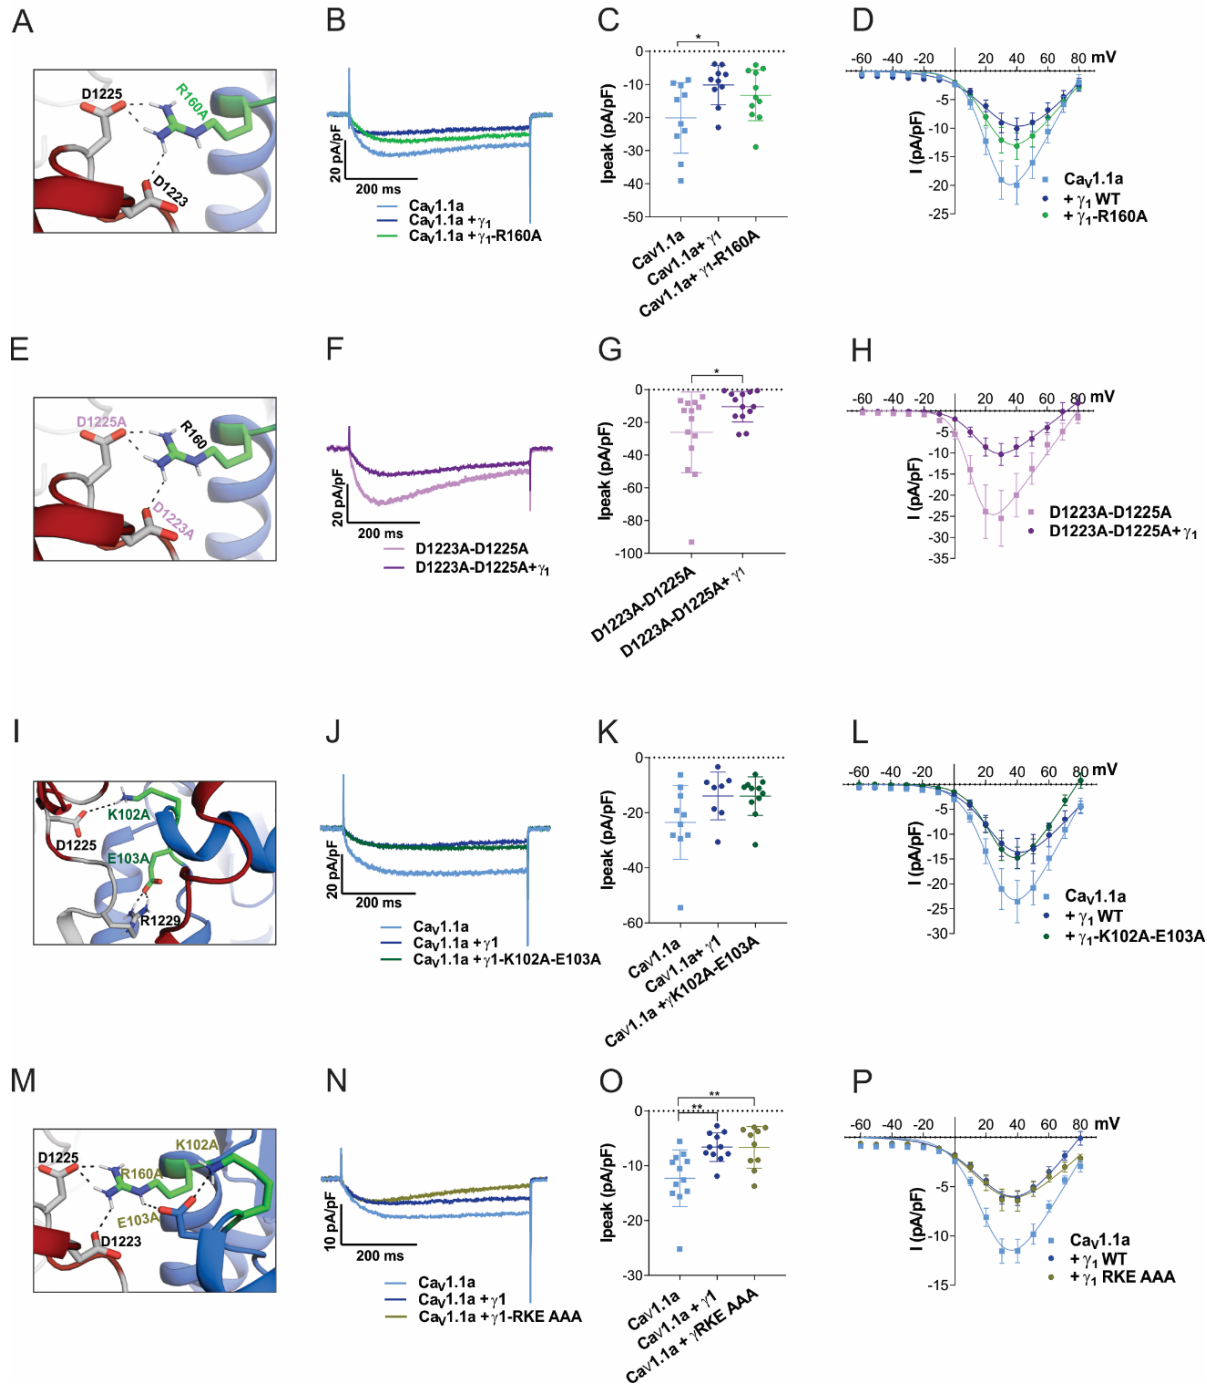

**Figure 6. The putative interactions between the IVS3-S4 loop and  $\gamma_1$  identified by structure modeling are dispensable for Cav1.1a current reduction. (A-H)** Structure modelling of Cav1.1a and  $\gamma_1$  indicates interactions of R160 ( $\gamma_1$ ) with D1223 and D1225 (Cav1.1a). Neutralizing the putative  $\gamma_1$  interaction partner (R160A) (A) or the Cav1.1a interaction partners (D1223A and D1225A) (E), did not impair current reduction by  $\gamma_1$  (B-D, F-H). (I-L) Structure modelling of Cav1.1a and  $\gamma_1$  indicates further interactions of K102 and e103 ( $\gamma_1$ ) with D1225 and R1229 (Cav1.1a). Neutralizing both of these putative Cav1.1a interaction partners to alanine (K102A/E103A) (I) did not abolish the ability of  $\gamma_1$  to reduce Cav1.1a current (J-K). Also concomitant mutation of all three  $\gamma_1$  residues involved in these putative interactions did not abolish the current reduction by  $\gamma_1$  (N-P). (B, F, J, N) Exemplary current traces at  $V_{max}$ , (C, G, K, O) scatter plots of  $I_{peak}$  and (D, H, L, P) current-voltage relationship. Mean $\pm$ SEM; P-values calculated with ANOVA and Tukey's post hoc test. \*  $P < 0.05$  and \*\*  $P < 0.01$ .

## Discussion

Whereas the role of the auxiliary  $\alpha_2\delta$  and  $\beta$  subunits in subcellular targeting and gating modulation have been extensively studied for high-voltage activated  $\text{Ca}^{2+}$  channels in heterologous cells, this has not been the case for the  $\gamma_1$  subunit.  $\gamma_1$  is a specific subunit of the skeletal muscle  $\text{Ca}_v1.1$  isoform and, until recently,  $\text{Ca}_v1.1$  had resisted efficient functional expression in heterologous expression systems. Only since the discovery of STAC3 as an essential component of the  $\text{Ca}_v1.1$  channel complex permitting the reliable heterologous expression of  $\text{Ca}_v1.1$  such analyses are possible (Horstick et al. 2013; Nelson et al. 2013; Polster et al. 2015). Here we developed and validated two HEK cell lines stably expressing STAC3 (plus  $\alpha_2\delta-1$  and  $\beta_3$ ), which proved to be a convenient and efficient heterologous expression system for  $\text{Ca}_v1.1$ . By co-expression of  $\text{Ca}_v1.1$  and  $\gamma_1$  in these cells, we found three effects of the  $\gamma_1$  subunit: facilitated membrane expression, a reduction of the current density, and a shift of steady-state inactivation to hyperpolarizing potentials. The effects of the  $\gamma_1$  subunit on the two splice variants of  $\text{Ca}_v1.1$  expressed in our new STAC3-HEK cell lines revealed a novel, isoform-dependent mechanism of channel modulation by this subunit. Although  $\gamma_1$  supports membrane expression of  $\text{Ca}_v1.1a$  and  $\text{Ca}_v1.1e$ , it only functions as a negative regulator of the adult of  $\text{Ca}_v1.1a$  splice variant. This differential regulation is mediated by the inclusion of the alternatively spliced exon 29 in the extracellular loop connecting helices S3 and S4 in repeat IV, but it does not require the direct ionic interactions between this loop and the  $\gamma_1$  subunit. Another novel finding is that in both, the adult and embryonic  $\text{Ca}_v1.1$  splice variant,  $\gamma_1$  reduces steady-state inward current at more negative voltages by shifting the voltage-dependence of steady-state inactivation but not of activation to more negative voltages and by promoting the time course of current inactivation.

### **The $\gamma_1$ subunit supports membrane expression of $\text{Ca}_v1.1$**

The substantially increased surface expression induced by co-expression of  $\gamma_1$  observed with extracellular bungarotoxin labeling and flow-cytometry did not translate into increased current densities. This is consistent with the observation that in  $\gamma_1$ -null mouse muscle, in which STAC3 is still endogenously expressed, the expression levels of  $\text{Ca}_v1.1$  are similar to those of wild type mice (Arikkath et al. 2003). In our experiments this is explained by the observation, that the effects of  $\gamma_1$  and STAC3 on membrane expression are not additive and therefore  $\gamma_1$  does not significantly increase  $\text{Ca}_v1.1$  beyond the level already achieved by STAC3. Apparently, an independent component must be limiting for membrane targeting. The effect of  $\gamma_1$  on membrane targeting in heterologous cells is consistent with a previous immunocytochemistry and charge movement analysis showing that in the absence of STAC3, the  $\gamma_1$  subunit supports robust membrane expression of  $\text{Ca}_v1.1$  in tsA201 cells, while promoting only very small currents

(Polster et al. 2016). On the contrary, an earlier Western blot analysis of tsA201 cells lysates reported that co-expression of  $\gamma_1$  reduces the levels of Cav1.1 protein expression (Sandoval et al. 2007). In sum, our results corroborate the findings that the  $\gamma_1$  subunit supports membrane expression of Cav1.1 in heterologous cell systems in a splice variant independent manner, possibly by masking retention motives on the C-terminus (Niu et al. 2018); however, without adding to the calcium influx.

### **The $\gamma_1$ subunit promotes steady-state inactivation in Cav1.1a and Cav1.1e**

Functionally, the two negative actions of  $\gamma_1$  on Cav1.1 currents dominate. The observed decrease in current amplitude and left-shift of steady-state inactivation are in general agreement with previous studies in muscle cells (Ahern et al. 2001; Freise et al. 2000) as well as in tsA201 cells expressing Cav1.1a (Polster et al. 2016). Limiting calcium influx through Cav1.1 during muscle activity is tolerable because of the principal role of Cav1.1 as voltage sensor in skeletal muscle EC coupling (Schneider and Chandler 1973; Rios and Brum 1987). At the same time, it is important to limit interference of calcium influx with other calcium signaling events, like those regulating fiber type specification, and to avoid adverse effects of calcium overload on the mitochondrial integrity (Sultana et al. 2016). Previously, we pointed out, how intrinsic mechanisms in the Cav1.1  $\alpha_{1S}$  subunit and the actions of auxiliary subunits cooperate in limiting the calcium currents in skeletal muscle (Tuluc et al. 2009; Flucher et al. 2005). Whereas the  $\alpha_2\delta$ -1 subunit slows down the activation, the  $\gamma_1$  subunit promotes voltage-dependent inactivation at more negative voltages and makes inactivation more complete. This effect was equally observed in the adult and, as shown here for the first time, also in the embryonic splice variant. Together with the observed increase in membrane targeting, this is the first experimental evidence demonstrating that the  $\gamma_1$  subunit functionally interacts with the embryonic splice variant Cav1.1e. Therefore this modulatory effect independent of the length of the extracellular loop connecting helices IVS3 and IVS4.

### **The $\gamma_1$ subunit reduces the current amplitude specifically in Cav1.1a**

The most interesting finding of this study is the differential down-regulation of calcium currents in Cav1.1a vs. Cav1.1e. The small current size is one of the hallmarks of skeletal muscle calcium currents. Our results demonstrate that the  $\gamma_1$  subunit is a major determinant of this reduced current density. Whereas in skeletal muscle the adult and embryonic Cav1.1 splice variants differ substantially in voltage-dependence of current activation and in current size, the currents recorded in the HEK cells (stably expressing  $\alpha_2\delta$ -1,  $\beta_3$ , and STAC3) reproduced the difference in  $V_{1/2}$  of activation, but not in current density. Apparently, this difference was due to the lack of one or more muscle-specific factors in the heterologous expression system. As co-expression of  $\gamma_1$  restored the reduced current density in Cav1.1a compared to Cav1.1e, the

$\gamma_1$  subunit is such a factor. Quantitatively, the difference in current density between the two splice variants was still smaller than that observed when the same constructs were expressed in dysgenic myotubes (Tuluc et al. 2016; Tuluc et al. 2009). Therefore, it is likely that other modulatory mechanisms present in the native environment of the channel in the skeletal muscle triads contribute to expression of this splice variant-specific difference. The  $\gamma_1$  subunit is the second identified protein that modulates differently the current properties of the two  $\text{Ca}_v1.1$  splice variants, after the RyR1 (Benedetti et al. 2015), and demonstrates the importance of the native cellular environment for the accurate expression of physiological current properties. Notably,  $\gamma_1$  does not reduce the current density of  $\text{Ca}_v1.1a$  by decreasing its plasma membrane expression. As previously shown,  $\text{Ca}_v1.1e$  has a higher open probability than  $\text{Ca}_v1.1a$  in skeletal myotubes (Tuluc et al. 2009). Therefore, the most likely explanation is that  $\gamma_1$  decreases the channel's maximal open probability in a splice variant-specific manner.

The sole difference in the primary structure between the embryonic and adult splice variants is the inclusion of 19 amino acids coded in exon 29 into the IVS3-S4 loop of  $\text{Ca}_v1.1a$ . Apparently, this difference determines the action of the  $\gamma_1$  subunit on current size. There are two possible mechanisms how inclusion of exon 29 can enable this functional interaction with  $\gamma_1$ . Direct interactions between the IVS3-S4 loop and  $\gamma_1$ , or the stabilization of a conformation of the channel complex by inclusion of exon 29 that renders  $\text{Ca}_v1.1a$  susceptible to this particular  $\gamma_1$  modulation. As the first possibility is amenable to experimental testing, we examined this possibility by identifying and mutating putative interaction sites on both channel subunits. However, none of these ion pairs seemed to be essential for the current-reducing action of  $\gamma_1$ . Therefore, it is very unlikely that this effect is mediated by the direct interaction of the  $\gamma_1$  subunit with the IVS3-S4 loop, although our experiments do not rule out this possibility. Alternatively, we conclude that insertion of exon 29 into this loop alters the conformation of the channel complex in a way that enables it to respond to the inclusion of  $\gamma_1$  with a reduced current density (Fig. 7A). Notably, the left-shifted activation in  $\text{Ca}_v1.1e$  compared to  $\text{Ca}_v1.1a$  is observed with or without  $\gamma_1$ , and the left-shifted inactivation is observed with or without exon 29, while the decreased current amplitude requires their co-operation. Evidently, the interdependence of the analyzed gating properties on the IVS3-S4 loop and the  $\gamma_1$  subunit is highly specific. Each of the partners independently exerts its specific action on the voltage dependences of activation and inactivation, respectively (Fig. 7B).

### **The role of the $\gamma_1$ subunit in retrograde coupling of $\text{Ca}_v1.1$ and RyR1:**

In skeletal muscle  $\text{Ca}_v1.1a$  calcium currents are augmented by an interaction of its cytoplasmic II-III loop with the RyR1 (Grabner et al. 1999). Previously we demonstrated that this function, termed retrograde coupling, is specific for the adult  $\text{Ca}_v1.1a$  splice variant (Benedetti et al. 2015). The currents of  $\text{Ca}_v1.1e$  are

not reduced when the connection with the RyR1 is severed. The dependence of the current augmentation by retrograde coupling on inclusion of exon 29 into the IVS3-S4 loop of  $Ca_v1.1$  mirrors the importance of exon 29 for the current reduction by  $\gamma_1$ . Based on the results of the earlier study we had proposed a mechanistic model according to which, retrograde coupling partially relieves the inhibition of  $Ca_v1.1$  currents by an unknown, exon 29-dependent factor. Our current study identifies the  $\gamma_1$  subunit as this inhibitory factor. In the simultaneous presence of exon 29 and the  $\gamma_1$  subunit, the currents of  $Ca_v1.1a$  are reduced, and this effect is partially counteracted by the interaction with RyR1. If either exon 29 or the  $\gamma_1$  subunit are missing, this inhibition is absent and there is nothing to be relieved by retrograde coupling (Fig. 7C).

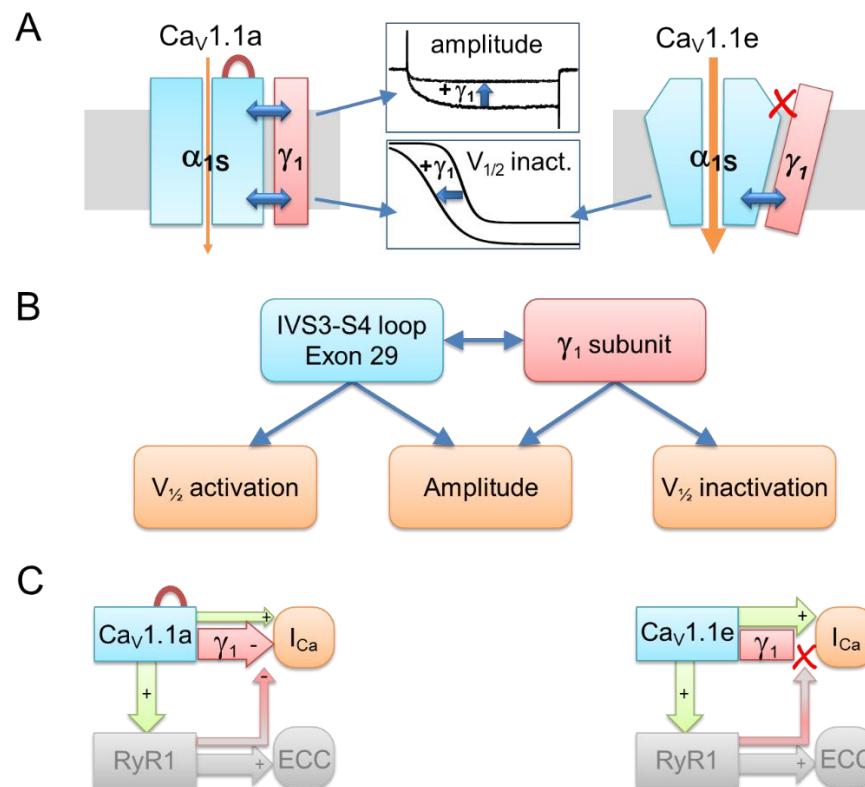

**Figure 7. Model of differential  $\gamma_1$  modulation on  $Ca_v1.1a$  and  $Ca_v1.1e$  currents and its consequences for retrograde coupling.** (A) In both  $Ca_v1.1$  splice variants the  $\gamma_1$  subunit limits calcium currents by shifting the voltage-dependence of inactivation to more hyperpolarizing potentials and rendering inactivation more complete. Inclusion of exon 29 in the extracellular IVS3-S4 loop stabilizes a conformation of the  $Ca_v1.1a$  channel complex, which enables the  $\gamma_1$  subunit to reduce the current amplitude. (B) The IVS3-S4 loop including exon 29 and the  $\gamma_1$  subunit require each other for reducing the current amplitude. In contrast, this cooperation is not required to shift the voltage dependence of activation and inactivation, which occurs in a splice-variant dependent manner. (C) In skeletal muscle cells, the negative regulation of calcium currents by the  $\gamma_1$  subunit is a prerequisite of retrograde current amplification by the RyR1 in  $Ca_v1.1a$  (red arrow from RyR1 to  $\gamma_1$ ) (Grabner et al. 1999; Nakai et al. 1996). Without exon 29 in embryonic  $Ca_v1.1e$ , no  $\gamma_1$ -dependent reduction of current amplitude and no RyR1-dependent relief of this inhibition occurs (Benedetti et al. 2015). The red loop in  $Ca_v1.1a$  indicates inclusion of exon 29.



## Conclusions

This analysis of the actions of the  $\gamma_1$  subunit on the two splice variants of  $\text{Ca}_v1.1$  in heterologous cells revealed multiple functions of  $\gamma_1$  in membrane targeting and functional modulation of the skeletal muscle calcium channel. Interestingly, some of the  $\gamma_1$  effects are general for both splice variants, while another is specific for the adult  $\text{Ca}_v1.1a$ . Inclusion of exon 29 in  $\text{Ca}_v1.1a$  appears to allosterically render the channel susceptible to the reduction of its currents by  $\gamma_1$ , as well as to the simultaneous relieve of this block by RyR1. Newly available mammalian cell systems proved highly valuable for this type of co-expression study of  $\text{Ca}_v1.1$ , but at the same time highlight the multitude of factors involved in shaping the physiological current properties in its native environment of skeletal muscle.

## Acknowledgements

We thank Katharina Heinz, Sandra Demetz, Irene Mahlrecht, Nicole Kranebitten, Enikő Török and Martin Heitz for excellent technical help. This work was supported by grants from the Tiroler Wissenschaftsfond 2018 (UNI-0404-2238 to MC), and from the Austrian Science Fund (FWF) (T855 and P33776 to MC, P30402 to BEF, P27809 to JS) and the Erika-Cremer habilitation fellowship of the University of Innsbruck to NJO. YEG, MFQ, and WET are students of the  $\text{Ca}_v\text{X}$  PhD program co-funded by FWF (DOC30) and the Medical University Innsbruck. HJD is an employee of Boehringer Ingelheim Pharma GmbH & Co KG. The authors declare no other competing financial interests.

Author contributions: MC and BEF conceived and designed the study. MC made the constructs, RT-PCR, WB analysis, flow cytometry stainings and acquired images. NJO generated the cell lines and acquired electrophysiological data for the HEK-STAC3 cell line under the supervision of JS. YEG and WET acquired all the remaining electrophysiological data under the supervision of MC, PT and BEF. WP and DW acquired and analyzed the flow cytometry data. MFQ and SM performed the modeling under the supervision of KL. HJD provided the cell line expressing  $\beta_3$  and  $\alpha_2\delta-1$ . MC, BEF and YEG wrote the manuscript. All authors contributed to the final draft of the manuscript.



## References

- Ahern, C. A., P. A. Powers, G. H. Biddlecome, L. Roethe, P. Vallejo, L. Mortenson, C. Strube, K. P. Campbell, R. Coronado, and R. G. Gregg. 2001. 'Modulation of L-type Ca<sup>2+</sup> current but not activation of Ca<sup>2+</sup> release by the gamma1 subunit of the dihydropyridine receptor of skeletal muscle', *BMC Physiol*, 1: 8.
- Andronache, Z., D. Ursu, S. Lehnert, M. Freichel, V. Flockerzi, and W. Melzer. 2007. 'The auxiliary subunit gamma 1 of the skeletal muscle L-type Ca<sup>2+</sup> channel is an endogenous Ca<sup>2+</sup> antagonist', *Proc Natl Acad Sci U S A*, 104: 17885-90.
- Arikkath, J., C. C. Chen, C. Ahern, V. Allamand, J. D. Flanagan, R. Coronado, R. G. Gregg, and K. P. Campbell. 2003. 'Gamma 1 subunit interactions within the skeletal muscle L-type voltage-gated calcium channels', *J Biol Chem*, 278: 1212-9.
- Armstrong, C. M., F. M. Bezanilla, and P. Horowicz. 1972. 'Twitches in the presence of ethylene glycol bis(-aminoethyl ether)-N,N'-tetracetic acid', *Biochim Biophys Acta*, 267: 605-8.
- Bender, B. J., A. Cisneros, 3rd, A. M. Duran, J. A. Finn, D. Fu, A. D. Lokits, B. K. Mueller, A. K. Sangha, M. F. Sauer, A. M. Sevy, G. Sliwoski, J. H. Sheehan, F. DiMaio, J. Meiler, and R. Moretti. 2016. 'Protocols for Molecular Modeling with Rosetta3 and RosettaScripts', *Biochemistry*, 55: 4748-63.
- Benedetti, B., P. Tuluc, V. Mastrolia, C. Dlaska, and B. E. Flucher. 2015. 'Physiological and pharmacological modulation of the embryonic skeletal muscle calcium channel splice variant CaV1.1e', *Biophys J*, 108: 1072-80.
- Biel, M., R. Hullin, S. Freundner, D. Singer, N. Dascal, V. Flockerzi, and F. Hofmann. 1991. 'Tissue-specific expression of high-voltage-activated dihydropyridine-sensitive L-type calcium channels', *Eur J Biochem*, 200: 81-8.
- Case, David A, TA Darden, TE Cheatham, Carlos L Simmerling, Junmei Wang, Robert E Duke, Ray Luo, MRCW Crowley, Ross C Walker, and Wei Zhang. 2008. "Amber 10." In.: University of California.
- Curtis, B. M., and W. A. Catterall. 1984. 'Purification of the calcium antagonist receptor of the voltage-sensitive calcium channel from skeletal muscle transverse tubules', *Biochemistry*, 23: 2113-8.
- Dayal, A., K. Schrotter, Y. Pan, K. Fohr, W. Melzer, and M. Grabner. 2017. 'The Ca(2+) influx through the mammalian skeletal muscle dihydropyridine receptor is irrelevant for muscle performance', *Nat Commun*, 8: 475.
- Dickson, C. J., B. D. Madej, A. A. Skjervik, R. M. Betz, K. Teigen, I. R. Gould, and R. C. Walker. 2014. 'Lipid14: The Amber Lipid Force Field', *J Chem Theory Comput*, 10: 865-79.
- Fang, K., and H. M. Colecraft. 2011. 'Mechanism of auxiliary beta-subunit-mediated membrane targeting of L-type (Ca(V)1.2) channels', *J Physiol*, 589: 4437-55.
- Flucher, B. E., G. J. Obermair, P. Tuluc, J. Schredelseker, G. Kern, and M. Grabner. 2005. 'The role of auxiliary dihydropyridine receptor subunits in muscle', *J Muscle Res Cell Motil*, 26: 1-6.
- Freise, D., B. Held, U. Wissenbach, A. Pfeifer, C. Trost, N. Himmerkus, U. Schweig, M. Freichel, M. Biel, F. Hofmann, M. Hoth, and V. Flockerzi. 2000. 'Absence of the gamma subunit of the skeletal muscle dihydropyridine receptor increases L-type Ca<sup>2+</sup> currents and alters channel inactivation properties', *J Biol Chem*, 275: 14476-81.
- Grabner, M., R. T. Dirksen, and K. G. Beam. 1998. 'Tagging with green fluorescent protein reveals a distinct subcellular distribution of L-type and non-L-type Ca<sup>2+</sup> channels expressed in dysgenic myotubes', *Proc Natl Acad Sci U S A*, 95: 1903-8.
- Grabner, M., R. T. Dirksen, N. Suda, and K. G. Beam. 1999. 'The II-III loop of the skeletal muscle dihydropyridine receptor is responsible for the Bi-directional coupling with the ryanodine receptor', *J Biol Chem*, 274: 21913-9.
- Gregg, R. G., A. Messing, C. Strube, M. Beurg, R. Moss, M. Behan, M. Sukhareva, S. Haynes, J. A. Powell, R. Coronado, and P. A. Powers. 1996. 'Absence of the beta subunit (cchb1) of the skeletal muscle

- dihydropyridine receptor alters expression of the alpha 1 subunit and eliminates excitation-contraction coupling', *Proc Natl Acad Sci U S A*, 93: 13961-6.
- Held, B., D. Freise, M. Freichel, M. Hoth, and V. Flockerzi. 2002. 'Skeletal muscle L-type Ca(2+) current modulation in gamma1-deficient and wildtype murine myotubes by the gamma1 subunit and cAMP', *J Physiol*, 539: 459-68.
- Horstick, E. J., J. W. Linsley, J. J. Dowling, M. A. Hauser, K. K. McDonald, A. Ashley-Koch, L. Saint-Amant, A. Satish, W. W. Cui, W. Zhou, S. M. Sprague, D. S. Stamm, C. M. Powell, M. C. Speer, C. Franzini-Armstrong, H. Hirata, and J. Y. Kuwada. 2013. 'Stac3 is a component of the excitation-contraction coupling machinery and mutated in Native American myopathy', *Nat Commun*, 4: 1952.
- Jay, S. D., S. B. Ellis, A. F. McCue, M. E. Williams, T. S. Vedvick, M. M. Harpold, and K. P. Campbell. 1990. 'Primary structure of the gamma subunit of the DHP-sensitive calcium channel from skeletal muscle', *Science*, 248: 490-2.
- Jo, S., J. B. Lim, J. B. Klauda, and W. Im. 2009. 'CHARMM-GUI Membrane Builder for mixed bilayers and its application to yeast membranes', *Biophys J*, 97: 50-8.
- Lacerda, A. E., H. S. Kim, P. Ruth, E. Perez-Reyes, V. Flockerzi, F. Hofmann, L. Birnbaumer, and A. M. Brown. 1991. 'Normalization of current kinetics by interaction between the alpha 1 and beta subunits of the skeletal muscle dihydropyridine-sensitive Ca<sup>2+</sup> channel', *Nature*, 352: 527-30.
- Lee, J., D. S. Patel, J. Stahle, S. J. Park, N. R. Kern, S. Kim, J. Lee, X. Cheng, M. A. Valvano, O. Holst, Y. A. Knirel, Y. Qi, S. Jo, J. B. Klauda, G. Widmalm, and W. Im. 2019. 'CHARMM-GUI Membrane Builder for Complex Biological Membrane Simulations with Glycolipids and Lipoglycans', *J Chem Theory Comput*, 15: 775-86.
- Nakai, J., R. T. Dirksen, H. T. Nguyen, I. N. Pessah, K. G. Beam, and P. D. Allen. 1996. 'Enhanced dihydropyridine receptor channel activity in the presence of ryanodine receptor', *Nature*, 380: 72-5.
- Nelson, B. R., F. Wu, Y. Liu, D. M. Anderson, J. McAnally, W. Lin, S. C. Cannon, R. Bassel-Duby, and E. N. Olson. 2013. 'Skeletal muscle-specific T-tubule protein STAC3 mediates voltage-induced Ca<sup>2+</sup> release and contractility', *Proc Natl Acad Sci U S A*, 110: 11881-6.
- Niu, J., W. Yang, D. T. Yue, T. Inoue, and M. Ben-Johny. 2018. 'Duplex signaling by CaM and Stac3 enhances CaV1.1 function and provides insights into congenital myopathy', *J Gen Physiol*, 150: 1145-61.
- Obermair, G. J., G. Kugler, S. Baumgartner, P. Tuluc, M. Grabner, and B. E. Flucher. 2005. 'The Ca<sup>2+</sup> channel alpha2delta-1 subunit determines Ca<sup>2+</sup> current kinetics in skeletal muscle but not targeting of alpha1S or excitation-contraction coupling', *J Biol Chem*, 280: 2229-37.
- Polster, A., B. R. Nelson, E. N. Olson, and K. G. Beam. 2016. 'Stac3 has a direct role in skeletal muscle-type excitation-contraction coupling that is disrupted by a myopathy-causing mutation', *Proc Natl Acad Sci U S A*, 113: 10986-91.
- Polster, A., S. Perni, H. Bichraoui, and K. G. Beam. 2015. 'Stac adaptor proteins regulate trafficking and function of muscle and neuronal L-type Ca<sup>2+</sup> channels', *Proc Natl Acad Sci U S A*, 112: 602-6.
- Rios, E., and G. Brum. 1987. 'Involvement of dihydropyridine receptors in excitation-contraction coupling in skeletal muscle', *Nature*, 325: 717-20.
- Rohl, C. A., C. E. Strauss, K. M. Misura, and D. Baker. 2004. 'Protein structure prediction using Rosetta', *Methods Enzymol*, 383: 66-93.
- Salomon-Ferrer, R., A. W. Gotz, D. Poole, S. Le Grand, and R. C. Walker. 2013. 'Routine Microsecond Molecular Dynamics Simulations with AMBER on GPUs. 2. Explicit Solvent Particle Mesh Ewald', *J Chem Theory Comput*, 9: 3878-88.
- Sandoval, A., J. Arikath, E. Monjaraz, K. P. Campbell, and R. Felix. 2007. 'gamma1-dependent down-regulation of recombinant voltage-gated Ca<sup>2+</sup> channels', *Cell Mol Neurobiol*, 27: 901-8.
- Schneider, M. F., and W. K. Chandler. 1973. 'Voltage dependent charge movement of skeletal muscle: a possible step in excitation-contraction coupling', *Nature*, 242: 244-6.

- Schredelseker, J., V. Di Biase, G. J. Obermair, E. T. Felder, B. E. Flucher, C. Franzini-Armstrong, and M. Grabner. 2005. 'The beta 1a subunit is essential for the assembly of dihydropyridine-receptor arrays in skeletal muscle', *Proc Natl Acad Sci U S A*, 102: 17219-24.
- Singer, D., M. Biel, I. Lotan, V. Flockerzi, F. Hofmann, and N. Dascal. 1991. 'The roles of the subunits in the function of the calcium channel', *Science*, 253: 1553-7.
- Sultana, N., B. Dienes, A. Benedetti, P. Tuluc, P. Szentesi, M. Sztretye, J. Rainer, M. W. Hess, C. Schwarzer, G. J. Obermair, L. Csernoch, and B. E. Flucher. 2016. 'Restricting calcium currents is required for correct fiber type specification in skeletal muscle', *Development*, 143: 1547-59.
- Tanabe, T., K. G. Beam, J. A. Powell, and S. Numa. 1988. 'Restoration of excitation-contraction coupling and slow calcium current in dysgenic muscle by dihydropyridine receptor complementary DNA', *Nature*, 336: 134-9.
- Tuluc, P., B. Benedetti, P. Coste de Bagneaux, M. Grabner, and B. E. Flucher. 2016. 'Two distinct voltage-sensing domains control voltage sensitivity and kinetics of current activation in CaV1.1 calcium channels', *J Gen Physiol*, 147: 437-49.
- Tuluc, P., N. Molenda, B. Schlick, G. J. Obermair, B. E. Flucher, and K. Jurkat-Rott. 2009. 'A CaV1.1 Ca<sup>2+</sup> channel splice variant with high conductance and voltage-sensitivity alters EC coupling in developing skeletal muscle', *Biophys J*, 96: 35-44.
- Ursu, D., R. P. Schuhmeier, M. Freichel, V. Flockerzi, and W. Melzer. 2004. 'Altered inactivation of Ca<sup>2+</sup> current and Ca<sup>2+</sup> release in mouse muscle fibers deficient in the DHP receptor gamma1 subunit', *J Gen Physiol*, 124: 605-18.
- Ursu, D., S. Sebillé, B. Dietze, D. Freise, V. Flockerzi, and W. Melzer. 2001. 'Excitation-contraction coupling in skeletal muscle of a mouse lacking the dihydropyridine receptor subunit gamma1', *J Physiol*, 533: 367-77.
- Wells, J. A. 1991. 'Systematic mutational analyses of protein-protein interfaces', *Methods Enzymol*, 202: 390-411.
- Wu, F., M. Quinonez, M. DiFranco, and S. C. Cannon. 2018. 'Stac3 enhances expression of human CaV1.1 in *Xenopus* oocytes and reveals gating pore currents in HypoPP mutant channels', *J Gen Physiol*, 150: 475-89.
- Wu, J., Z. Yan, Z. Li, X. Qian, S. Lu, M. Dong, Q. Zhou, and N. Yan. 2016. 'Structure of the voltage-gated calcium channel Ca(v)1.1 at 3.6 Å resolution', *Nature*, 537: 191-96.
- Wu, J., Z. Yan, Z. Li, C. Yan, S. Lu, M. Dong, and N. Yan. 2015. 'Structure of the voltage-gated calcium channel Cav1.1 complex', *Science*, 350: aad2395.
- Yang, T., X. Xu, T. Kernan, V. Wu, and H. M. Colecraft. 2010. 'Rem, a member of the RGK GTPases, inhibits recombinant CaV1.2 channels using multiple mechanisms that require distinct conformations of the GTPase', *J Physiol*, 588: 1665-81.
- Zamponi, G. W., J. Striessnig, A. Koschak, and A. C. Dolphin. 2015. 'The Physiology, Pathology, and Pharmacology of Voltage-Gated Calcium Channels and Their Future Therapeutic Potential', *Pharmacol Rev*, 67: 821-70.

## Supplementary figures

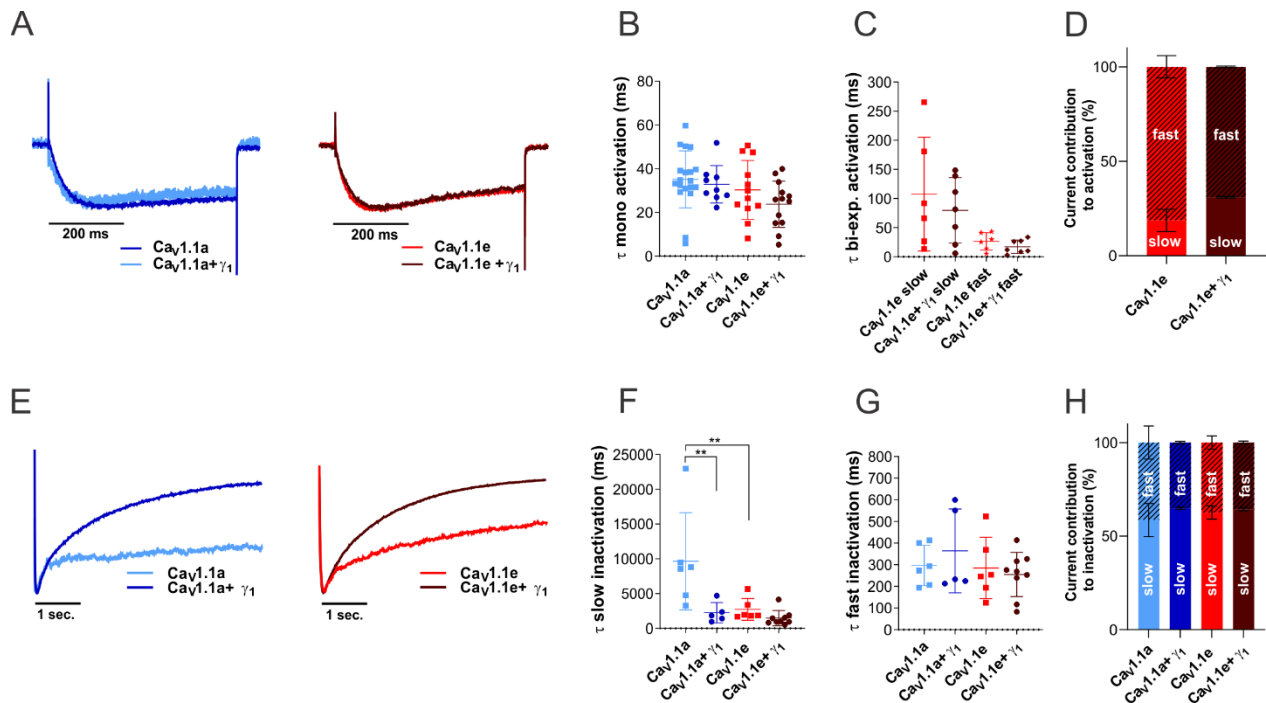

**Figure S1.  $\gamma_1$  does not affect activation kinetics but accelerates inactivation kinetics in Cav1.1a. (A-D)**

Time constants of activation of Cav1.1a (blue, n=19), Cav1.1a +  $\gamma_1$  (dark blue, n=9), Cav1.1e (red, n=12) and Cav1.1e +  $\gamma_1$  (dark brown, n=13) of a mono-exponential and bi-exponential fit (Cav1.1e) on the rising phase of the inward calcium current during a 500 ms depolarization to  $V_{max}$ . **(A)** Example traces of 500 ms depolarization to  $V_{max}$  in Cav1.1a (left) and Cav1.1e (right), normalized to the peak current. No differences were found between the time constant of activation of Cav1.1a or Cav1.1e with or without  $\gamma_1$  co-expression when fitted mono-exponentially **(B)** or between the fast or slow time constant of Cav1.1e (n=6) and Cav1.1e +  $\gamma_1$  (n=7) of the recordings that could be fitted bi-exponentially **(C)**, Cav1.1a and Cav1.1a +  $\gamma_1$  could only be fitted mono-exponentially. The current contribution of the fast component was bigger than that of the slow component in both Cav1.1e (slow:fast  $\approx$  20:80) and Cav1.1e +  $\gamma_1$  (slow:fast  $\approx$  30:70), but the ratios were similar (p=0.41) **(D)**. **(E-H)** Slow and fast time constant of inactivation of Cav1.1a (blue, n=6), Cav1.1a +  $\gamma_1$  (dark blue, n=5), Cav1.1e (red, n=6) and Cav1.1e +  $\gamma_1$  (dark brown, n=9) of a bi-exponential fit on the decay phase of the inward calcium current during a 5 sec. depolarization to  $V_{max}$ . **(E)** Example traces of 5 sec. depolarization to  $V_{max}$  in Cav1.1a (left) and Cav1.1e (right), normalized to the peak current. A significant acceleration (p=0.007) of the slow time constant of inactivation was found when Cav1.1a was co-expressed with  $\gamma_1$ , co-expression of Cav1.1e with  $\gamma_1$  shows a 2-fold, but not significant, acceleration (p=0.88) **(F)**. No differences were found between Cav1.1a and Cav1.1e with or without  $\gamma_1$  co-expression in the fast time constant of inactivation **(F)**. The ratios of current contribution to inactivation of the slow

versus fast component were similar between all four groups ( $p=0.61$  for  $Ca_v1.1a$  vs.  $Ca_v1.1a + \gamma_1$ ,  $p=0.79$  for  $Ca_v1.1e$  vs.  $Ca_v1.1e + \gamma_1$ ), with a somewhat higher contribution of the slow than the fast component (slow:fast  $\approx 60:40$ ). Mean $\pm$ SEM; Significance was calculated with ANOVA and Sidak's post hoc test. \*\*  $P<0.001$ . P-values for current contributions were calculated with Student's t-test.

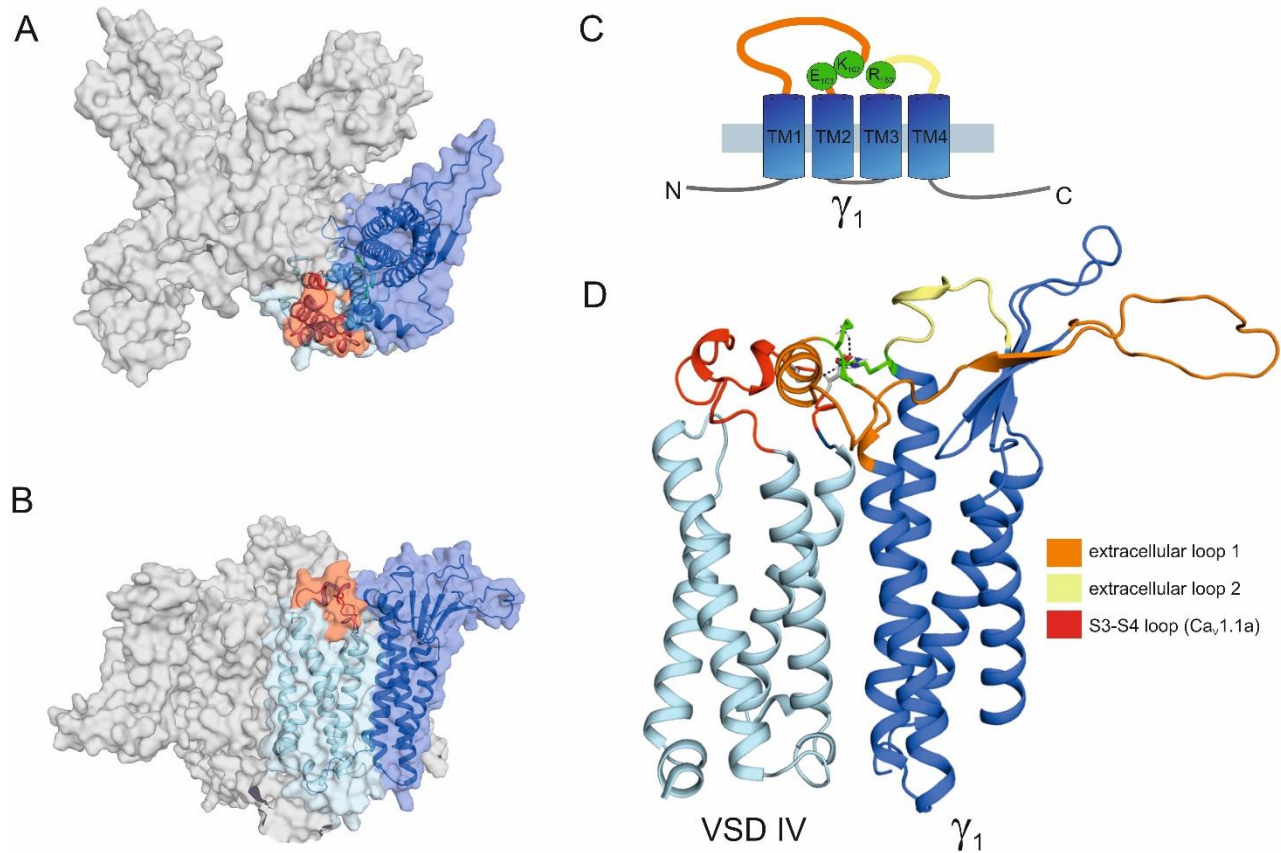

**Figure S2. Structure modeling of Cav1.1a in complex with the  $\gamma_1$  subunit** (A) Top view of the structure model of the human Cav1.1  $\alpha_1$  subunit in complex with the  $\gamma_1$  subunit refined with molecular dynamics (MD) simulation in a membrane environment based on the 3.6 Å structure of rabbit Cav1.1 (Wu et al. 2016). VSD IV (light blue) is interacting with the  $\gamma_1$  subunit (marine). The alternatively spliced exon 29 (red) is inserted in the IVS3-S4 linker of Ca<sub>v</sub>1.1a. (B) Side view of the structure model of the Cav1.1 with the  $\gamma_1$  subunit. (C) Cartoon showing the domain organization of  $\gamma_1$ , with the mutated residues R160, K102 and E103 in green. (D) Close-up of the interaction side of the VSD IV S3-S4 loop with the  $\gamma_1$  subunit, highlighting the extracellular loops of the  $\gamma_1$  subunit. The extracellular loop 1 of  $\gamma_1$  is in the same orientation as presented in Figure 6 (Panels A, E, M) and residue R160 is highlighted in green.



**Table S1-** Current-voltage parameters (activation) for whole-cell electrophysiology experiments and fit equation of Ca<sub>v</sub>1.1a and Ca<sub>v</sub>1.1e in HEK-STAC3 and HEK-TetOn-STAC3

|                            | HEK-STAC3            |                      |                  | HEK-TetOn-STAC3      |                      |                  |
|----------------------------|----------------------|----------------------|------------------|----------------------|----------------------|------------------|
|                            | Ca <sub>v</sub> 1.1a | Ca <sub>v</sub> 1.1e | p-value (t-test) | Ca <sub>v</sub> 1.1a | Ca <sub>v</sub> 1.1e | p-value (t-test) |
| I <sub>peak</sub> (pA/pF)  | -19.8±2.7            | -19.5±2.4            | 0.94             | -18.2±3.1            | -21.3±4.5            | 0.56             |
| V <sub>1/2 act.</sub> (mV) | 25.1±0.7             | 4.5±1.0              | ****             | 24.1±1.4             | 3.0±1.5              | ****             |
| k act. (mV)                | 8.4±0.3              | 7.2±0.2              | ***              | 7.0±0.5              | 5.3±0.3              | 0.011*           |
| V <sub>rev</sub> (mV)      | 84.2±0.9             | 73.3±1.2             | ****             | 81.2±1.7             | 72.8±1.6             | 0.0013**         |
| time to peak (ms)          | 173.1±10.8           | 162.6±12.0           | 0.52             | 198.3±20.4           | 184.1±14.3           | 0.06             |
| n                          | 15                   | 15                   | --               | 19                   | 15                   | --               |

Data are expressed as mean values ± SEM.

**Table S2 -** Current-voltage parameters (activation and inactivation) for whole-cell electrophysiology experiments and fit equation of Ca<sub>v</sub>1.1a and Ca<sub>v</sub>1.1e in the presence and absence of γ<sub>1</sub>

|                                     | Ca <sub>v</sub> 1.1a | Ca <sub>v</sub> 1.1a + γ <sub>1</sub> | p-value         | Ca <sub>v</sub> 1.1e | Ca <sub>v</sub> 1.1e + γ <sub>1</sub> | p-value       |
|-------------------------------------|----------------------|---------------------------------------|-----------------|----------------------|---------------------------------------|---------------|
| I <sub>peak</sub> (pA/pF)           | -18.9±2.9            | -7.8±1.2                              | 0.012* (t-test) | -24.1±4.0            | -26.1±2.7                             | 0.69 (t-test) |
| V <sub>1/2 act.</sub> (mV)          | 26.3±1.0             | 29.4±2.0                              | 0.14 (t-test)   | 3.9±1.1              | 4.5±0.9                               | 0.68 (t-test) |
| k act. (mV)                         | 6.8±0.2              | 8.3±0.8                               | 0.03* (t-test)  | 5.1±0.3              | 5.2±0.2                               | 0.7 (t-test)  |
| V <sub>rev</sub> (mV)               | 83.4±1.1             | 78.6±2.8                              | 0.07 (t-test)   | 75.7±2.0             | 76.0±1.3                              | 0.9 (t-test)  |
| time to peak (ms)                   | 150.1±18.0           | 102.9±15.0                            | 0.08 (t-test)   | 104.4±11.0           | 97.1±13.3                             | 0.67 (t-test) |
| τ <sub>mono</sub> activation (ms)   | 35.1±3.0             | 32.9±2.9                              | 0.95 (Anova)    | 30.3±5.5             | 23.7±4.0                              | 0.44 (Anova)  |
| τ <sub>slow</sub> activation (ms)   | --                   | --                                    | --              | 107.4±39.9           | 79.6±21.2                             | 0.62 (Anova)  |
| A <sub>slow</sub> activation (%)    | --                   | --                                    | --              | 18.7±6.9             | 31.0±11.8                             | 0.41 (t-test) |
| τ <sub>fast</sub> activation (ms)   | --                   | --                                    | --              | 26.4±6.1             | 17.1±4.4                              | 0.95 (Anova)  |
| A <sub>fast</sub> activation (%)    | --                   | --                                    | --              | 81.3±6.9             | 69.0±11.8                             | 0.41 (t-test) |
| n (activation)                      | 19                   | 10                                    | --              | 12                   | 13                                    | --            |
| V <sub>1/2 inact.</sub> (mV)        | 2.5±1.9              | -16.0±6.0                             | 0.013* (t-test) | -13.7±1.9            | -31.5±3.3                             | *** (t-test)  |
| non-inactivated current (%)         | 28.5±3.1             | 13.2±5.5                              | 0.03* (t-test)  | 24.6±4.3             | 4.5±1.8                               | *** (t-test)  |
| k inac. (mV)                        | 5.2±0.3              | 11.0±0.6                              | **** (t-test)   | 3.7±0.6              | 7.1±0.4                               | *** (t-test)  |
| τ <sub>slow</sub> inactivation (ms) | 9646.0±2851.0        | 2258.5±550.3                          | 0.007** (Anova) | 2734.0±552.0         | 1480.0±364.6                          | 0.88 (Anova)  |
| A <sub>slow</sub> inactivation (%)  | 58.6±8.8             | 64.8±6.3                              | 0.61 (t-test)   | 62.6±3.5             | 64.4±4.3                              | 0.79 (t-test) |
| τ <sub>fast</sub> inactivation (ms) | 296.8±38.0           | 364.3±73.2                            | 0.79 (Anova)    | 285.3±50.1           | 254.9±34.1                            | 0.96 (Anova)  |
| A <sub>fast</sub> inactivation (%)  | 41.4±8.8             | 35.2±6.3                              | 0.61 (t-test)   | 37.4±3.5             | 35.6±4.3                              | 0.79 (t-test) |
| n (inactivation)                    | 7                    | 7                                     | --              | 8                    | 9                                     | --            |

Data are expressed as mean values ± SEM.

**Table S3** - Current-voltage parameters (activation) for whole-cell electrophysiology experiments and fit equation of  $Ca_v1.1a$ -D1223A-D1225A,  $\gamma_1$ -R160A,  $\gamma_1$ -K102A-E103A and  $\gamma_1$ -R160A-K102A-E103A (RKEAAA) mutants

|                     | $Ca_v1.1a$               | $Ca_v1.1a+ \gamma_1$                 | p-value (ANOVA)  | $Ca_v1.1a+ \gamma_1$ -R160        | p-value (ANOVA) |
|---------------------|--------------------------|--------------------------------------|------------------|-----------------------------------|-----------------|
| $I_{peak}$ (pA/pF)  | -20.1±3.4                | -10.1±1.9                            | 0.04*            | -13.3±2.3                         | 0.20            |
| $V_{1/2}$ act. (mV) | 23.1±0.6                 | 30.7±2.2                             | 0.004**          | 24.1±1.3                          | 0.88            |
| k act. (mV)         | 7.0±0.3                  | 13.1±1.8                             | 0.001**          | 8.5±0.4                           | 0.58            |
| $V_{rev}$ (mV)      | 82.7±2.2                 | 86.1±3.9                             | 0.65             | 87.4±1.3                          | 0.42            |
| time to peak (ms)   | 131.8±18.8               | 102.6±8.4                            | 0.26             | 95.3±8.9                          | 0.12            |
| n                   | 10                       | 10                                   | --               | 11                                | --              |
|                     | $Ca_v1.1a$ D1223A-D1225A | $Ca_v1.1a$ D1223A-D1225A+ $\gamma_1$ | p-value (t-test) |                                   |                 |
| $I_{peak}$ (pA/pF)  | -26.1±6.6                | -10.4±2.6                            | 0.04*            | --                                | --              |
| $V_{1/2}$ act. (mV) | 12.8±0.8                 | 15.8±0.9                             | 0.02*            | --                                | --              |
| k act. (mV)         | 6.3±0.4                  | 7.1±0.5                              | 0.22             | --                                | --              |
| $V_{rev}$ (mV)      | 73.5±2.5                 | 69.7±4.3                             | 0.44             | --                                | --              |
| time to peak (ms)   | 87.2±11.0                | 66.6±10.7                            | 0.20             | --                                | --              |
| n                   | 14                       | 13                                   | --               | --                                | --              |
|                     | $Ca_v1.1a$               | $Ca_v1.1a+ \gamma_1$                 | p-value (ANOVA)  | $Ca_v1.1a+ \gamma_1$ -K103A-E104A | p-value (ANOVA) |
| $I_{peak}$ (pA/pF)  | -23.6±4.2                | -13.9±3.1                            | 0.13             | -14.0±2.1                         | 0.09            |
| $V_{1/2}$ act. (mV) | 25.1±1.0                 | 26.9±0.2                             | 0.40             | 28.2±0.9                          | 0.06            |
| k act. (mV)         | 8.7±0.5                  | 9.8±0.2                              | 0.20             | 8.7±0.4                           | 0.99            |
| $V_{rev}$ (mV)      | 86.7±1.8                 | 91.8±0.2                             | 0.24             | 81.2±2.7                          | 0.17            |
| time to peak (ms)   | 121.5±18.5               | 99.8±0.9                             | 0.69             | 108.5±13.3                        | 0.85            |
| n                   | 10                       | 8                                    | --               | 11                                | --              |
|                     | $Ca_v1.1a$               | $Ca_v1.1a+ \gamma_1$                 | p-value (ANOVA)  | $Ca_v1.1a+ \gamma_1$ -RKE AAA     | p-value (ANOVA) |
| $I_{peak}$ (pA/pF)  | -12.3±1.5                | -6.6±0.8                             | 0.006**          | -6.6±1.2                          | 0.008**         |
| $V_{1/2}$ act. (mV) | 20.6±0.9                 | 28.2±3.3                             | 0.13             | 25.7±4.2                          | 0.38            |
| k act. (mV)         | 8.9±0.6                  | 13.9±2.2                             | 0.07             | 13.4±2.0                          | 0.12            |
| $V_{rev}$ (mV)      | 89.8±2.0                 | 83.2±4.2                             | 0.24             | 92.5±2.9                          | 0.76            |
| time to peak (ms)   | --                       | --                                   | --               | --                                | --              |
| n                   | 12                       | 11                                   | --               | 10                                | --              |

Data are expressed as mean values ± SEM.
